1  
2  
3  
4  
5  
6  
7  
8  
9  
10  
11  
12  
13  
14  
15  
16  
17  
18  
19  
20  
21

# Modeling the effectiveness of Esperanza Window Traps as a complementary vector control strategy for achieving the community-wide elimination of Onchocerciasis

Shakir Bilal<sup>1</sup>, Morgan E. Smith<sup>2</sup>, Swarnali Sharma<sup>3</sup>, Wajdi Zaatour<sup>1</sup>,  
Ken Newcomb<sup>1</sup>, Thomas R. Unnasch<sup>1</sup>, Edwin Michael<sup>1\*</sup>

**1** Center for Global Health Infectious Disease Research, University of South Florida, Tampa, FL, United States of America

**2** Department of Biological Sciences, University of Notre Dame, South Bend, IN, United States

**3** Department of Mathematics, Vijaygarh Jyotish Ray College, Kolkata-700032, India

\* Corresponding author: [emichael443@usf.edu](mailto:emichael443@usf.edu)

## 22 **Abstract**

23 Mathematical models of parasite transmission provide powerful quantitative tools for evaluating the  
24 impact of interventions for bringing about the control or elimination of community-level disease  
25 transmission. A key attribute of such tools is that they allow integration of field observations regarding  
26 the effectiveness of an intervention with the processes of parasite transmission in communities to allow  
27 the exploration of parameters connected with the optimal deployment of the intervention to meet various  
28 community-wide control or elimination goals. In this work, we analyze the effectiveness of the Esperanza  
29 Window Trap (EWT), a recently developed black fly control tool, for eliminating the transmission of  
30 *Onchocera volvulus* in endemic settings by coupling seasonally-driven onchocerciasis transmission  
31 models identified for representative villages in Uganda with a landscape-level, spatially-informed model  
32 of EWT trap configurations for reducing Simulid fly populations in a given endemic setting. Our results  
33 indicate that when EWT traps are used in conjunction with MDA programs there are significant savings in  
34 the number of years needed to reach a specified set of elimination targets compared to the use of MDA  
35 alone. Adding EWT after the meeting of these thresholds and stoppage of MDA also significantly enhances  
36 the long-term sustained elimination of onchocerciasis. The number of traps required is driven by the trap  
37 black fly killing efficiency, capture range, desired coverage, inter-trap distance, size of location, and the  
38 spatial heterogeneity obtaining for the fly population in a given village/site. These findings provide  
39 important new knowledge regarding the feasibility and effectiveness of the community-wide use of EWT  
40 as a supplementary intervention alongside MDA for accelerating and sustaining the achievement of  
41 sustainable onchocerciasis elimination. Our coupling of landscape models of EWT deployment with the  
42 seasonal onchocerciasis transmission model also highlights how population-level macroparasite models  
43 may be extended effectively for modeling the effects of spatio-temporal processes on control efforts.

## 44 **Author summary**

45 While empirical studies have highlighted the effectiveness of the Esperanza Window Trap (EWT) as a  
46 potential tool for reducing biting black fly populations, information regarding how to implement these traps  
47 in the field to bring about community-wide elimination of onchocerciasis transmission is lacking. Here, we  
48 show how coupling a data-driven seasonal onchocerciasis transmission model with a landscape model of  
49 EWT trap networks can provide a flexible and powerful quantitative framework for addressing the  
50 effectiveness of deploying EWT in the field for bringing about parasite elimination in conjunction with mass  
51 drug administration (MDA). Our results demonstrate that including EWT traps with ivermectin MDA can  
52 significantly reduce timelines to reach elimination thresholds, while introducing these traps post-MDA can  
53 ensure the sustained long-term elimination of parasite transmission. The optimal trap configuration for  
54 meeting these goals will depend on the trap efficiencies for fly capture and killing, trap attractant range, field  
55 coverage, inter-trap distance, number of traps used, area of a control setting and the spatial variation  
56 observed for the density of biting black flies. This work also highlights how population-level models of  
57 macroparasite transmission dynamics could be extended successfully to effectively investigate these  
58 questions.

## 59 **Introduction**

60 Onchocerciasis (river blindness), caused by infection with the *Simulium* black fly-transmitted filarial  
61 nematode, *Onchocerca volvulus*, continues to remain a serious tropical disease in many parts of Africa and in  
62 certain settings in Latin America (1-3). Current estimates, for example, suggest that at least 14.65 million  
63 people may be infected with the parasite, and that up to 217.5 million people continue to be at risk of  
64 infection in these regions (1, 4-7). This is despite the institution of long-term large regional and national-  
65 scale control programs, beginning with the initiation of vector control-based efforts from the mid-1970s in  
66 West Africa before community-wide mass drug administration (MDA) of ivermectin became the mainstay of  
67 national interventions from the 1990s (5, 8-10). While the initial focus of these programs was on morbidity  
68 control (11-13), the success of using MDA alone in achieving the elimination of onchocerciasis as a public  
69 health problem in 11 out of 13 foci in the Americas (13, 14), and in interrupting transmission in many foci in  
70 Africa more recently (4, 5, 15, 16), has led to high expectations that the global elimination of the disease  
71 using this therapeutic approach may be possible (1, 17). This shift in focus from reduction or control of the  
72 burden of the disease to transmission interruption has led to the ramping up of control activities using MDA  
73 (7, 17); however, it has also highlighted the difficulties of achieving the long-term interruption of parasite  
74 transmission in every infection setting by means of MDA alone (1, 18) . This is particularly the case for  
75 populations that continue to remain exposed to high black fly populations and communities facing significant  
76 social and operational challenges in delivering the long-term high coverage MDA required for bringing about  
77 transmission elimination (1, 17, 19-21). These biosocial and technical challenges have led to the increasing  
78 recognition that cost-effective, socially acceptable, strategies that can complement MDA will need to be  
79 developed and assessed in order to successfully bring about the global elimination of the disease (22).

80 Recently, several workers have suggested integrating MDA with vector control (VC) to overcome these  
81 challenges (17, 23, 24). These workers stress how combining treatment of humans alongside the reduction  
82 of the prevailing vector density can serve to act on both microfilarial loads and vector-human contact rates  
83 synergistically in a population to facilitate a more rapid achievement of transmission elimination. One such  
84 recently investigated VC tool is the Esperanza window trap (EWT), first developed and used in Mexico, and

85 subsequently evaluated in Burkina Faso and Uganda (1, 25-27), which has been shown to constitute a highly  
86 effective and easily implementable method for trapping *S. damnosum* black flies (25-28). The trap, utilizing a  
87 combination of olfactory cues and visual attractants to lure adult host-seeking blackflies, was initially used as  
88 a tool for xenomonitoring (21, 25, 29), but more recent studies have indicated that EWTs may also represent  
89 a potent means to reduce the local fly population potentially to levels that may facilitate the breakage of  
90 transmission (25, 28). Thus, EWTs baited with human sweat compounds and CO<sub>2</sub> and deployed in  
91 households and schools were shown to be able to reduce *S. onhraceum* s.L. by 14-51% in Mexico (26, 30),  
92 while field trials carried out using traps baited with sweat-impregnated articles of clothing within classrooms  
93 in Northern Uganda showed that these could reduce *S. damnosum* biting rates in classes by as high as 91%  
94 (31). However, while these results highlight the utility of using EWTs as an effective VC tool particularly for  
95 locations where people congregate for carrying out daily activities, the evidence for their effectiveness in  
96 reducing fly numbers when deployed in outdoor settings has been variable (30-32). Moreover, there are also  
97 indications that the efficacy of these traps for trapping the same fly species could vary from one country to  
98 another (30, 31). These variable experimental results indicate that while EWTs may offer a promising tool  
99 for achieving black fly control, there is a need to evaluate the sources of the differences observed in fly  
100 trapping effectiveness under diverse transmission conditions if they are to be deployed successfully for  
101 assisting with eliminating the transmission of onchocerciasis.

102 Three sets of key questions require addressing for assessing the usefulness of EWTs, and indeed attractant-  
103 based insect traps in general, for reducing and breaking community-wide vector-borne macroparasitic  
104 disease transmission. The first are questions related to the components of an attractant insect trap network  
105 for effectively trapping and killing the target insect over a given landscape. These specifically include  
106 quantifying the impacts of trap densities, their placements, and attractiveness as well as effectiveness as a  
107 whole for capturing and killing insects in a given environment (33). The second set of questions is concerned  
108 with quantitative methods for relating recorded EWT fly collections in a locality to the corresponding local  
109 community vector biting rate, and to both vector and human infection incidences or prevalences. Addressing  
110 this association will be key to evaluating the utility of the EWT as a tool for bringing about community-wide  
111 parasite transmission elimination (34). Finally, assessment of the effectiveness of the tool for facilitating

112 community transmission elimination also requires quantifying how combining EWT with MDA programs can  
113 have a synergistic effect in accelerating and sustaining the elimination of *O. volvulus* transmission in settings  
114 exposed to different black fly intensities or endemicity.

115 We have recently shown how simulation or computational models of macroparasite transmission can offer  
116 important quantitative tools for investigating the above questions by virtue of their ability to relate the  
117 components and actions of a control technology with the diverse states and processes governing the  
118 transmission dynamics of a disease in a host population (34-36). Indeed, the further capability of modeling  
119 frameworks for being able to integrate evidence from trial observations of a control measure in selected  
120 locations with the general process-based information contained within a theoretical model also means that  
121 such data-driven process-based simulation models can not only recapitulate existing empirical  
122 measurements but also predict the effects of the intervention under transmission conditions that have not  
123 yet been tested (37, 38). This means that such quantitative tools can offer a key scientific means for exploring  
124 the full range of possible transmission effects arising from an intervention via facilitating the effective  
125 extrapolation of existing trial observations to all relevant spatial domains or locations of interest (34). This is  
126 an important feature as it means that these modeling systems can afford generalizable or systematic insights  
127 into the operation of an intervention, which will be difficult to achieve using empirical field trials alone. This  
128 critical ability of models for being able to simulate the likely future states of an infection system undergoing a  
129 particular intervention in diverse settings has been key to their rising acceptance and adoption by decision  
130 makers as a means for evaluating intervention options that may best bring about the achievement of national  
131 and global disease management goals (17, 24, 35, 39-42).

132 Here, we describe the development and use of a data-driven process-based modeling framework for  
133 investigating the utility of combining EWTs with MDA as a new two-pronged strategy for progressing  
134 onchocerciasis elimination under typical endemic conditions. We note that according to WHO guidelines (1,  
135 43), the decision for declaring that the ultimate elimination of parasite transmission has occurred in a setting  
136 is to be based on human and entomological infection surveys which will be carried out in three phases – with  
137 the first phase focused on assessing if specific WHO-defined human infection and infective thresholds in

138 black fly populations below which transmission is thought not possible have been met, followed by  
139 additional entomological surveys in phase 2 (termed as the post-treatment phase (PTS)) and subsequent  
140 primarily parasitological surveys in phase 3 (the so called ‘post-elimination survey’) for confirming the  
141 absence of either ongoing, residual or resurging infections in vector and human populations respectively. As  
142 previously (34), we use the community-wide human infection threshold of 1% microfilarial (Mf) prevalence  
143 and an ATP (annual transmission potential) value of 20 infective bites per person per year defined originally  
144 as transmission elimination targets by the WHO for onchocerciasis in the foregoing analyses (44). We focus  
145 on the parameters for the field deployment of EWT plus MDA for enhancing each phase of the WHO  
146 transmission interruption assessment strategy in the analysis, with achievement of phases 2 and 3 examined  
147 by addressing the ability of the tool for bringing about long-term breakage of transmission post stoppage of  
148 MDA.

149 Our simulation system for addressing the utility of EWT plus MDA for accelerating and sustaining  
150 onchocerciasis transmission elimination has three major components. First, models of black fly trapping  
151 efficacies using various EWT field or network configurations are constructed. These are then combined with  
152 our population-level model describing the seasonal population dynamics of onchocerciasis. Finally, the  
153 coupled system is integrated with steps that include the estimation of initial conditions, launching of  
154 simulations, and carrying out analyses of model solutions for evaluating the impact of the supplementary  
155 EWT strategy for enhancing the efforts of MDA alone in meeting the infection and transmission elimination  
156 thresholds described above (45). We begin by presenting the mathematical basis of our capture probability  
157 model for EWTs based on the concept of an effective black fly attraction range and killing efficiency, and  
158 various parameters related to the deployment of insect attractant traps in a landscape, such as inter-trap  
159 distance, numbers of traps, areal coverage, size of area, and decay of trapping effectiveness (28, 31). We then  
160 describe how we couple this landscape-based spatially-explicit trap model with novel extensions of our  
161 seasonal population-level model of onchocerciasis transmission to allow simulations of the impact of using  
162 various trap configurations for reducing the community-level ATP, and by acting synergistically with MDA  
163 for reducing human infection to below the 1% Mf prevalence threshold. We performed these analyses by  
164 using transmission models calibrated to site-specific data from four previously described representative

165 onchocerciasis endemic study villages from Uganda (34), which also allowed an examination of the impacts  
166 of seasonality and endemicity on transmission outcomes due to the EWT-based interventions. We end by  
167 discussing our results in terms of the potential of using EWTs acting in conjunction with MDA for achieving  
168 area-wide onchocerciasis elimination. We also highlight how population-level macroparasite transmission  
169 models, such as our deterministic onchocerciasis transmission dynamics model, can be effectively extended  
170 to address the spatio-temporal complexities that may govern the effectiveness of the EWT tool for bringing  
171 about parasite interruption in the real-world. Finally, we touch upon the value of using process-based  
172 simulation systems, such as the one developed here, as a means for extending the evidence regarding an  
173 intervention obtained from field trials so that higher-order knowledge generalizable to diverse transmission  
174 conditions can be discovered and used effectively in policy making.

## 175 **Methods**

### 176 [Simulation system overview](#)

177 Our data-driven computational system for carrying out simulations of the effects of EWT combined with MDA  
178 versus using MDA alone for reducing and eliminating onchocerciasis transmission at its core comprises the  
179 integration of three components (Figure 1). These include firstly the setting up and coupling of mathematical  
180 models of black fly capture probabilities over a landscape given various EWT trap configurations and  
181 parameters, including different trapping network patterns, trap attractive range, fly killing efficiency, and  
182 decay of trap attractiveness (31, 33), with our age structured-seasonal model of onchocerciasis transmission  
183 (34) that allows for the incorporation of both MDA and VC using EWT (see below). The parameters of the  
184 onchocerciasis model are then identified for a setting in this system via a calibration step, wherein we use  
185 our previously developed Monte-Carlo based Bayesian Melding (BM) data assimilation methodology to  
186 discover an ensemble of models that best-fit baseline site-specific infection data (35, 40, 46). Once these  
187 models are identified for a location, we implement and simulate the effects of control arising from the  
188 deployment of different EWT trap configurations and MDA strategies by linking their respective effectiveness  
189 in reducing the community-wide vector biting rate (EWT traps) as well as infection in the human population



190 (MDA) on the overall dynamics of *O. volvulus* transmission in step three (31, 34). More specifically, here, we  
 191 perform a comparative analysis of the impacts of using MDA alone versus combined MDA and EWT by  
 192 evaluating: 1) the timelines predicted for each of these interventions to cross the specified community-wide  
 193 Mf prevalence (=1%) and ATP (=20) elimination thresholds, and 2) their subsequent ability for bringing  
 194 about long-term transmission interruption post-stoppage of MDA.

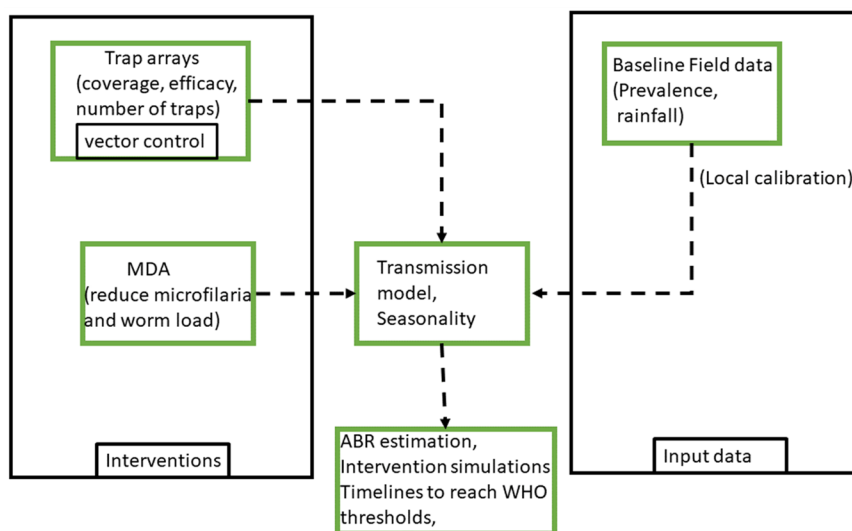

Figure 1. The computational framework for integrating interventions (EWT vector control and MDA interventions), the seasonal age-structured transmission model of onchocerciasis, and baseline field data.

195

## 196 The mathematical model for quantifying EWT fly capture probability over an 197 area

198 We begin by assuming that each EWT represents a square of dimension of  $l \times l$  (Figure 2(a)). Typically, an  
 199 array of such traps is placed at the village/site of interest; a possible array of traps is shown in Figure 2(b)  
 200 assuming that the village is a rectangular box with an area  $A$ . The inter-trap distance is  $d$  while each  
 201 individual trap in the array has a capture or attractant radius  $r$ . The capture radius defines a circular area  
 202 around a trap where all the flies are trapped if they fly within this radius. If there are  $N_t$  number of traps, then  
 203 the areal coverage  $C_{Tr}$  in such a trap configuration or network can be defined as:

$$C_{Tr} = \frac{A_c}{A} \quad (1)$$

204 where  $A_c = N_T \pi r^2$  is the combined capture area of all the traps. The total number of traps  $N_T$  is then related  
 205 to capture radius of individual traps  $r$  and the inter-trap distance  $d$  as follows:

$$N_T = \left( \frac{\sqrt{A} - 2r}{d} + 1 \right)^2 \quad (2)$$

206 The above equations assume that the capture probability of a trap is unity within the capture or fly attractive  
 207 radius of the trap and zero otherwise; this in turn can be used to determine the optimal distance  $d$  between  
 208 traps to achieve a desired number of traps given a particular coverage,  $C_{Tr}$ . When the capture probability of a  
 209 trap is a continuous function of trap distance (instead of the Heaviside function considered here), the  
 210 computation of capture probabilities via an array of traps becomes cumbersome as the capture probabilities  
 211 of individual traps overlap. On the other hand, when fly capture by an individual trap is modeled by a hard

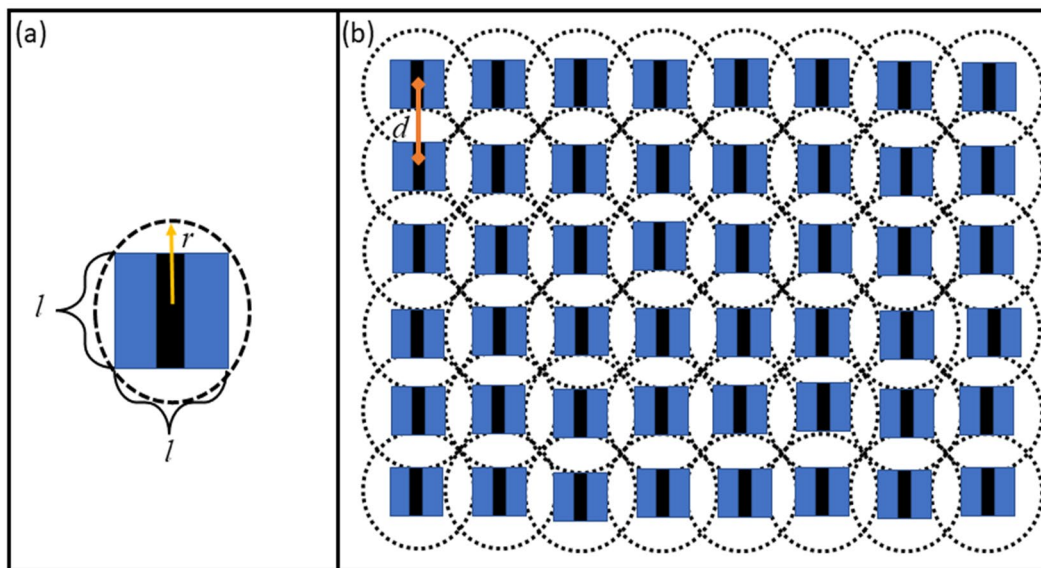

Figure 2. (a) An EWT trap with capture radius  $r$  and dimensions  $l \times l$ . (b) A rectangular array of EWT traps placed over a landscape with a separation distance  $d$ .

212 radius of capture probability as described above, this approximation can be used to provide estimations of  
213 the upper limits on the number of traps required to achieve a given coverage as shown by Equation (2).

## 214 Heterogeneous fly distribution

215 The above capture equations (Equation (1) and Equation (2)) represent the situation where the black fly  
216 population is homogeneously distributed and is assumed to bite hosts uniformly across a setting. In reality,  
217 fly biting and population distribution are likely to be spatially heterogeneous (47, 48). This spatial  
218 heterogeneity can govern the optimal number of traps required to achieve the desired coverage levels. To  
219 calculate the number of traps in a spatially heterogeneous setting, we ideally require knowledge of the exact  
220 distribution of a fly population in such locations. However, the use of a discrete distribution, such as the  
221 Dirac-delta function to represent the localization of flies within an area of interest, wherein we assume that  
222 there are discrete areas in a setting with flies and areas without any flies (49), can allow the effective  
223 calculation of the number of traps required under this simplifying condition. Thus, assuming that the total  
224 area of sites where the flies are absent is  $A_{\Delta}$ , the coverage Equation (1) and the number of traps Equation (2)  
225 can be modified to obtain an areal trap coverage under heterogeneous fly biting,  $C_{Thet}$  as:

$$\begin{aligned} C_{Thet} &= \frac{\pi r^2}{A - A_{\Delta}} \sum_{i,j}^{N_T, N_f} \delta(n - n_0) \\ &= \frac{\pi r^2 N_f}{A - A_{\Delta}} \end{aligned} \quad (3)$$

226 where  $N_f$  is the number of sites where flies are present,  $N_T$  is the maximum number traps that can be  
227 accommodated for an inter trap distance  $d$ , and  $\delta$  denotes the Dirac-delta function for locating the presence of  
228 flies at a specific point,  $n_0$ , over a grid of discrete locations,  $n$ , within an area (ie. flies are present if  $n = n_0$   
229 or absent otherwise) (49). In this formulation, it can be seen that if the trap coverage is set to be the same as  
230 in the homogeneous case the effective number of traps is simply equal to the number of sites where flies are  
231 present:

$$N_f = \left( \frac{\sqrt{A} - 2r}{d} + 1 \right)^2 \left( 1 - \frac{A_\Delta}{A} \right) \quad (4)$$

232 Equation 4 implies that the required number of traps decreases linearly with  $A_\Delta/A$ , where  $A_\Delta/A$  is a measure  
 233 of the spatial heterogeneity observed for the biting black fly population.

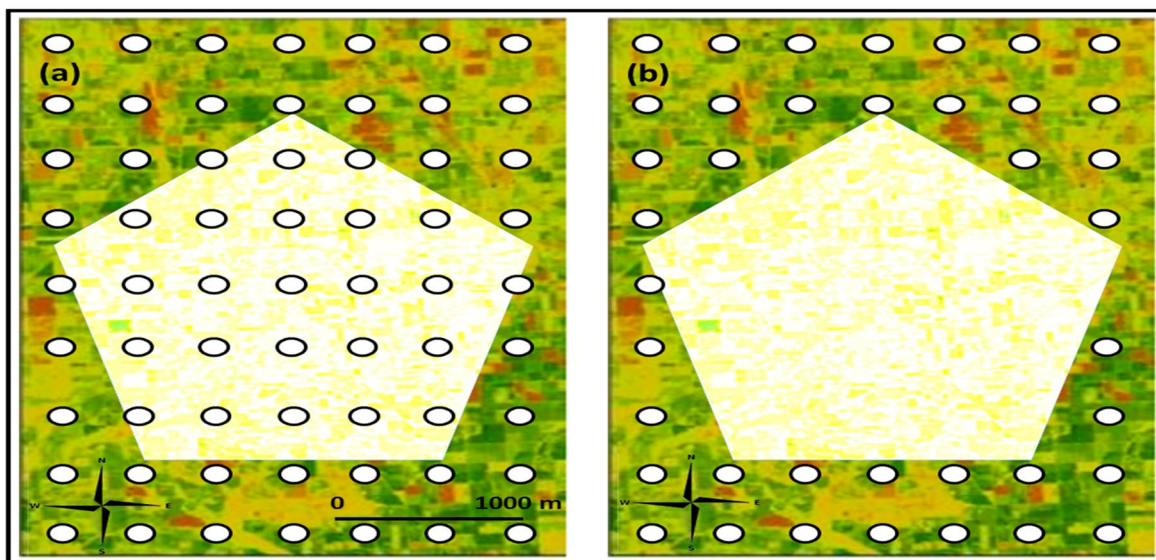

234 Figure 3. An array of EWT traps placed to capture flies in an heterogenous fly environment to achieve a  
 desired coverage. We assume that flies are concentrated at the periphery of the shown region. (a)  
 Placing traps flies by ignoring the fly distribution pattern. (b) Placing traps in the periphery. Both these  
 configuration of trap networks achieve the same coverage but accounting for heterogeneity requires a  
 lower number of traps.

235 To demonstrate how Equation 4 could be used in a field setting, we consider toy examples of fly  
 236 heterogeneity and the corresponding optimal trap placement inside a village represented by a rectangular  
 237 box as shown in Figure 3. In Figure 3(a) traps are placed by ignoring the fact that flies are concentrated at the  
 238 periphery of the village (darker pixels), while in Figure 3(b) traps are placed in just those areas where flies  
 239 are present. In this case, it is clear that accounting for fly heterogeneity would require a lower number of  
 240 traps than otherwise to achieve a given coverage. The situation demonstrated in Figure 3(b) is similar to the  
 241 one studied in reference (31), where the traps were able to reduce bites if placed in the periphery of fields,  
 242 close to fly habitats. If traps are deployed by ignoring heterogeneity in flies as in Figure 3(a), then some traps

243 among the array might be ineffective/irrelevant in reducing the number of bites. The number of ineffective  
 244 traps in that case is given by the  $N_{ineffective}=N_T - N_f$  :

245

$$N_{ineffective} = \left( \frac{\sqrt{A} - 2r}{d} + 1 \right)^2 \frac{A_\Delta}{A} \quad (5)$$

246 Equation (5) shows that in contrast to  $N_f$ , ineffective traps will increase linearly with the fly heterogeneity  
 247 parameter.

## 248 [Onchocerciasis transmission model](#)

249 The onchocerciasis transmission model used in this study is an immigration-death deterministic model  
 250 describing the aggregate-level transmission dynamics of the parasite in both human and black fly  
 251 populations. As detailed previously (34, 46, 50), the model is based on a set of coupled partial and ordinary  
 252 differential equations, where the population-level age-structured pre-patent  $P(a, t)$  and patent  $W(a, t)$  worm  
 253 burdens, microfilariae counts  $M(a, t)$ , and acquired immunity  $I(a, t)$  in the human host are dynamically  
 254 modelled by partial differential equations over time ( $t$ ) and age ( $a$ ), whereas the dynamics of infective L3  
 255 stage larvae per black fly ( $L$ ) are modelled by an ordinary differential equation over time. The governing  
 256 equations describing the dynamics of these system variables are:

$$\begin{aligned} \frac{\partial P(a, t)}{\partial a} + \frac{\partial P(a, t)}{\partial t} &= \Phi L^* F_1(I(a, t)) F_2(W_T(a, t)) - \mu_w P(a, t) \\ &\quad - \Phi L^* F_1(I(a, t - \tau)) F_2(W_T(a, t - \tau)) \zeta \\ \frac{\partial W(a, t)}{\partial a} + \frac{\partial W(a, t)}{\partial t} &= \Phi L^* F_1(I(a, t - \tau)) F_2(W_T(a, t - \tau)) \zeta - \mu_w W(a, t) \\ \frac{\partial M(a, t)}{\partial a} + \frac{\partial M(a, t)}{\partial t} &= F_3(W_T(a, t)) - \gamma M(a, t) \\ \frac{\partial I}{\partial a} + \frac{\partial I}{\partial t} &= W_T(a, t) - \delta I(a, t) \\ L^* &= F_4(W_T(a, t)) \end{aligned} \quad (6)$$

257 Here, the functions  $F_x$  denote the density dependent mechanisms that govern the various transition or  
258 development rates of different states in the parasite life cycle (34, 46, 50). Note that some of these functions  
259 are dependent on the total worm load ( $W_T = W(a,t) + P(a,t)$ ), while the rest depend on the larval state ( $L^*$ )  
260 and host immunity ( $I$ ). Due to the significantly faster time scale of the infection dynamics in black flies  
261 compared to worm infection in humans, we further assume that the density of infective stage larvae in the  
262 vector population reaches a dynamic equilibrium ( $L^*$ ) rapidly and use this simplification to simulate the  
263 infective stage larval dynamics. Details of all the parameters and functional forms are explained and  
264 described in the supplementary document Tables S1, S2.

## 265 Bayesian Melding (BM)-based calibration of the model

266 We estimated parameters for the onchocerciasis transmission model via calibration of the model to a set of  
267 four previously published baseline infection datasets that spanned the range of endemic conditions that  
268 typically underlie the transmission of the disease (34) (Table S3). The model calibration exercise to identify  
269 best-fitting models for these locations was carried out using the flexible Monte-Carlo based BM data  
270 assimilation framework (35, 51). This method uses the following workflow. First, using the known ranges of  
271 the model parameter values, we define uniform prior distributions for each parameter and randomly sample  
272 with replacement from these distributions to generate  $N = 200,000$  parameter vectors. The model is then run  
273 with each of the  $N$  parameter vectors, which generate  $N$  outputs predicting Mf prevalence by age. The  
274 simulated Mf prevalences are then compared against the age-stratified Mf prevalence data in each setting by  
275 calculating binomial log-likelihoods for each parameter vector. Since the datasets used in this work do not  
276 include age-stratified Mf prevalence data, age infection profiles were obtained from the observed overall  
277 community prevalence by following the procedure presented in Smith et al (36). Next, a Sampling-  
278 Importance-Resampling (SIR) algorithm is used to sample  $n = 500$  parameter vectors with replacement from  
279 the pool of  $N$  parameter vectors with probabilities proportional to their relative log-likelihood values. This  
280 step generates the  $n$  parameter vectors most likely to represent the observed data. These  $n$  posterior  
281 parameter vectors are then used to compute distributions of variables of interest from the fitted models

282 pertinent to this study (viz. age-prevalence curves and infection trajectories in both the human and black fly  
283 vector populations following interventions). **Note that this approach, which results in the estimation and use  
284 of transmission models calibrated to local conditions, also** provides an opportunity for examining the impacts  
285 of the variable endemic conditions that are typically observed in the field on onchocerciasis control dynamics  
286 (34, 46, 50).

## 287 Steps to simulate MDA and EWT-based vector control

### 288 Simulating MDA control

289 We aimed to compare the complementary impact of EWT when added to onchocerciasis ivermectin-based  
290 MDA interventions with the outcomes arising from the use of the MDA strategy alone. The impact of MDA is  
291 modelled by assuming that the drug instantaneously kills  $\omega$  and  $\varepsilon$  fractions of the adult worms (both pre-  
292 patent ( $P$ ) worm and patent ( $W$ ) adult worms) and Mf ( $M$ ) populations. Because of uncertainty in the efficacy  
293 of annual IVM against adult *O. volvulus* parasites, the efficacy parameter  $\omega$  is varied from 0.05 to 0.3 (39, 41,  
294 42, 52-57) in the simulations. The effective population sizes of worms and microfilariae stages after drug  
295 treatment are given by:

$$\left. \begin{aligned} P(a, t + dt) &= (1 - \omega C)P(a, t) \\ W(a, t + dt) &= (1 - \omega C)W(a, t) \\ M(a, t + dt) &= (1 - \varepsilon C)M(a, t) \end{aligned} \right\} t = T_{MDA} \quad (7)$$

296 where  $dt$  represents a short time-period since  $T_{MDA}$ , the time-point the  $i^{th}$  round of MDA was administered,  
297 and the drug coverage at the population level is given by the parameter  $C$ . Each round of MDA kills a fraction  
298 of each worm stage (via values of  $\omega$  and  $\varepsilon$ ); however, the production of Mf by the surviving worms (53, 57) is  
299 reduced by a factor of  $(1 - \delta_{reduc}C)$ :

$$\frac{\partial M}{\partial t} + \frac{\partial M}{\partial a} = (1 - \delta_{reduc}C)s\alpha\phi[W(a, t), k]W(a, t) - \mu_2 M(a, t), \quad \text{for } T_{MDA_i} < t \leq T_{MDA_i} + T_P$$

300 where  $\alpha' = \alpha(1 - \delta_{reduc} C)$  is the reduced fecundity (over a period of  $T_P$  months since the  $i^{th}$  MDA) of the  
301 surviving adult worms at each MDA. The priors for  $\omega$ ,  $\varepsilon$  and  $T_P$  as given in Table S4 in the supplementary  
302 document.

### 303 Seasonality and simulating vector control using EWT

304 It has been shown that the use of EWT reduces the number of black fly bites on humans through trapping and  
305 killing of these flies when deployed persistently near fly habitats (31). We thus expect that the deployment  
306 of these traps across a locality will drive down the overall local black fly population and thereby decrease the  
307 aggregate vector-human biting or contact rate in the community (31). We further assume that one instance of  
308 EWT deployment constitutes placement of traps over a duration of a month with lures replenished on a  
309 monthly basis. On the other hand, seasonality in fly population dynamics, particularly associated with rainfall  
310 patterns, is a well-known driver of fly biting rates (22, 31). These factors suggest that simulating the impact  
311 of EWT-based vector control necessitates modeling the fly biting rates as a function of seasonal rainfall  
312 patterns (34), spatial biting patterns, and effects of deploying EWT traps over a setting on a monthly time-  
313 scale (31, 58). Here, we thus simulate the impact of EWT by first combining our previously developed model  
314 describing seasonally-varying black fly monthly infective biting rates (MTP) (34), with the vector control  
315 action of EWT in reducing the monthly fly biting rate,  $MBR(m)$ , as follows:

$$MBR(m) = MBR_M \left( \frac{1}{1 - \frac{A_\Delta}{A}} \right) \left( 1 - e^{-\left(\frac{R_t(m)}{R_L}\right)^{k_1}} \right) e^{-\left(\frac{R_t(m)}{R_U}\right)^{k_2}} (1 - \eta e^{-\Lambda t} C_{Tr}) \quad (8)$$

316 where  $MBR_M$  is the maximum expected biting rate in a homogeneous environment,  $R_U$  and  $R_L$  represent upper  
317 and lower rainfall thresholds above and below which fly biting is greatly reduced, and  $k_1$  and  $k_2$  are shape  
318 parameters. Second, in environments with heterogeneous fly biting distribution, we scale up the mean  
319 maximum expected biting rate by a factor of  $\left( \frac{1}{1 - \frac{A_\Delta}{A}} \right)$  so that the average maximum expected biting rate over  
320 the area  $A$  of the village is still  $MBR_M$ . Finally, the term  $(1 - \eta e^{-\Lambda t} C_{Tr})$  describes the reduction in MBR as a  
321 function of trap fly killing efficiency  $\eta$ , trap coverage,  $C_{Tr}$ , as described in Equation 1 (the uniform biting case)



322 or by Equation 3 (the heterogeneous biting case ( $C_{Thet}$ )), and decay of trap fly killing effectiveness as defined  
323 by the term,  $e^{-\Lambda t}$ . Note here in passing that this formulation also represents a novel method for  
324 incorporating the (discretized) variability in biting fly distributions that may occur in a landscape into a  
325 population-level parasite transmission model. The prior parameter ranges for  $\eta$  and  $\Lambda$  are given in Table S4  
326 of the supplementary document. The other parameters in Equation 8 were obtained via the calibration of this  
327 rainfall dependent seasonal MBR model to monthly biting data from the control sites (no vector control)  
328 using BM with a pass/fail filter as described in (45).

### 329 [Modeling EWT and MDA intervention scenarios](#)

330 We investigated the additional impact of combining EWT with MDA as a two-pronged integrated VC-drug  
331 treatment strategy for accelerating onchocerciasis transmission elimination by running our coupled EWT  
332 trap-transmission dynamics simulation model to mimic the effects of different control scenarios related to  
333 various EWT configurations and MDA strategies. These included modeling: 1) the impacts of various EWT  
334 configurations (variations in trap capture or attractant radius, fly killing efficiency, inter-trap distance,  
335 coverage and trap numbers) in reducing ATP, and 2) comparing annual and switch MDA (annual MDA for 10  
336 years followed by a switch or change to bi-annual MDA) interventions alone versus including EWT into these  
337 drug regimens on the timelines required to cross target community-wide  $M_f$  ( $=1\%$ ) and ATP ( $=20$ )  
338 thresholds. Transmission models fitted to the four study sites used here were further employed to explore  
339 the impact of endemicity on the timelines to elimination arising from the implementation of the above  
340 intervention scenarios. Further, different EWT deployment frequencies were also simulated to investigate  
341 the impacts of using EWT a month before the peak fly biting season, for three months over the peak biting  
342 season and at monthly intervals during the year. This allowed examination of the impact of seasonality in the  
343 black fly population dynamics on the optimal timing of EWT deployment for reducing the ATP in a  
344 community. Note here that while our transmission model is calibrated to reductions in MBR based on  
345 empirical data from the EWT field experiments that specifically focused on the monthly effectiveness of the  
346 traps for reducing this variable (31), we predict the corresponding effect on ATP by multiplying the

347 estimated MBRs (Equation 8) by the monthly population averaged  $L3^*$  values, and then summing the  
348 resulting monthly transmission potentials (MTPs) to obtain the yearly ATP (34):

$$ATP(year) = \sum_m MTP(m) = \sum_{m=1...12} L^* \times MBR(m) \quad (9)$$

349 All the vector control scenarios in combination with MDA were modelled at the WHO-recommended drug  
350 coverage of 80%.

### 351 **Impact on long-term transmission elimination and recrudescence**

352 We addressed this critical question by evaluating the behavior of the model trajectories once population  
353 infection prevalences in each of the four study sites are predicted to cross the threshold of 1% Mf following  
354 MDA, and all further drug applications are stopped. The impact of including EWT versus no vector control on  
355 elimination and recrudescence was compared post stoppage of MDA at two time points – five years post MDA  
356 (to cover the PTS assessment period) and fifteen years post MDA (to evaluate the longer-term impact of EWT  
357 on parasite elimination). Following Sharma et al.(59), we calculated the probability that transmission  
358 extinction has been achieved in a site due to an applied intervention by quantifying the proportion of the  
359 best-fit SIR model prevalences that were declining or declined to zero (ie. models giving rise to Mf prevalence  
360 curves with significant negative slopes) by the end of the 5 or 15-year simulation period following the  
361 crossing of the 1% Mf threshold value. The recrudescence probability for a given site was similarly calculated  
362 as the proportion of the total SIR selected model runs that managed to revive and generate positive increases  
363 in Mf prevalence (ie. give rise to Mf curves with significant positive slopes) by the end of each of the above  
364 simulation periods once MDAs are stopped. Finally, the curves having non-significant and fluctuating positive  
365 or negative slopes are considered as those exhibiting transient dynamical behavior (59).

366

## 367 **Results**

### 368 **Identifying locality-specific seasonally-driven onchocerciasis transmission models**

369 The impact of using EWT in the field in conjunction with annual and switch MDA on the timelines required to  
370 breach the community-wide 1% Mf prevalence and 20 ATP thresholds was investigated in this work using  
371 our data-driven seasonal MBR-based transmission model calibrated to four endemic village communities in  
372 Uganda (34). The fits of the model to baseline MF age-prevalences observed in each of these study sites using  
373 the BM-based data assimilation approach are shown in Figure S1 in the Supporting Information. Note as  
374 described previously (34, 35, 46), given uncertainty in parameter values, we identify 500 best-fitting models  
375 to characterize the local parasite transmission dynamics in a setting. The good fits of the models to data  
376 portrayed in Figure S1 amply highlight the capability and versatility of the BM framework for reliably  
377 capturing and differentiating between the transmission dynamics of onchocerciasis that prevailed pre-  
378 intervention in the four settings.

### 379 **EWT parameters and the annual transmission potential (ATP)**

380 We began our investigation of the impact of using EWT for eliminating parasite transmission from *Simulid*  
381 populations by evaluating the resulting village-wide reductions predicted for ATP as a function of differences  
382 in the parameters related to the deployment of traps (or the configuration of the trap network) in an endemic  
383 area. The results illustrated in Figure 4 are for the transmission model estimated for the village of Masaloo,  
384 and are based on assuming that the village encompasses a rectangular area of  $1 \text{ km}^2$ , each trap has an fly  
385 killing efficacy of 70% (31) and a capture or attractant radius of 200m, and that traps are deployed on a  
386 monthly basis for a year. The simulations show firstly that decreasing the inter-trap distance,  $d$ , will decrease  
387 the ATP in this village, such that approximately at an inter-trap distance of 490 m (vertical solid line in Figure  
388 4 (a)) the ATP threshold of 20 infective bites per person per year will be breached. Figure 4 (b) on the other  
389 hand highlights how changes in the inter-trap distance will affect the areal coverage,  $C_{Tr}$ , required to keep  
390 the ATP below the threshold of 20 infective annual bites per person. Thus, while an inter-trap distance of

391 approximately 600m will result in a coverage value of 50%, this will clearly be insufficient to breach the ATP  
392 threshold. By contrast, only the decrease of this distance to 490m will allow the crossing of this threshold as  
393 a result of the increase brought about in areal coverage to approximately 60%.

394 The results in Figure 4 (c) and Table 1, however, indicate that the number of traps required to breach the 20  
395 ATP threshold is determined by both trap coverage and the area of a village. Thus, Figure 4 (c) shows that  
396 given a trap fly killing efficacy of 70%, capture radius of 200m, an inter-trap distance of 490m and assuming  
397 that the area of Masaloo is 1  $km^2$ , the total number of traps required to achieve a coverage of 60 % (for  
398 breaching the ATP threshold in this example) is approximately 5 traps, all placed along a rectangular array as  
399 shown in Figure 3 for the homogeneous biting case (solid blue curve). The required number of traps for  
400 different coverages and village areal sizes along with corresponding inter-trap distances are further recorded  
401 in Table 1, which show that while the number of traps required to achieve 60-70% coverage will generally  
402 increase with area (for all fly distribution patterns), for a given areal size, this number will decline  
403 dramatically as the trapping radius and distance between traps increase. This three-way relationship  
404 indicates that as the capture radius of the trap increases, traps can be placed at greater between-trap  
405 distances, which in turn will lower the required number of traps for crossing a given ATP threshold.  
406 Additionally, the optimal coverage (and hence number of traps) needed generally to cross the ATP threshold  
407 is also influenced by trap efficacy in killing the trapped flies. This relationship is shown in Figure 4 (d), which  
408 demonstrates that as fly killing efficacy,  $\eta$ , increases, the ATP threshold can be achieved at a lower coverage  
409 and vice-versa (as denoted by the orange curve). Importantly, the results also indicate that there is a critical  
410 trap fly killing efficacy (approximately 45% in the present example) below which the ATP threshold cannot  
411 be achieved within a year even when coverage is maximal (100%). By contrast, achieving any of the efficacy  
412 and coverage values above the orange curve will lead to the ATP threshold of 20 infective bites per person  
413 per year being reached within a year of monthly EWT deployment (Figure 4(d). These results are derived  
414 from the models fitted to the village of Masaloo. Similar results were obtained for the other three study  
415 villages investigated here, indicating the generality of these findings.

416

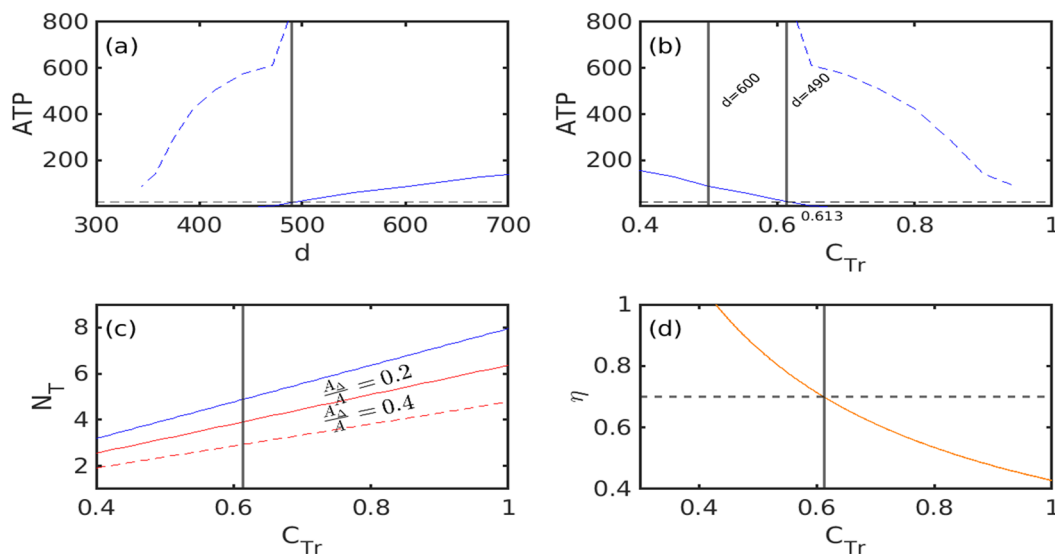

Figure 4. Curves in (a)-(b) show mean (solid blue) and 95 % confidence intervals (dashed blue) for ATP changes when an array of traps is deployed. The ATP decreases to the values as shown, starting from the baseline median value, after deployment of EWT for a year to reach the ATP threshold of 20 bites per year per person. Trap fly killing efficacy in these simulations is assumed to be 70 %. In (a), the lower inter-trap distances mean greater reduction in ATP, whereas in (b) higher coverage corresponds to greater reduction in ATP. The dashed-black horizontal line in (a) and (b) shows the ATP threshold of 20 bites per person per year. (c) The relationship between number of traps and the corresponding coverage achieved for a homogeneous fly distribution scenario (blue line) for two different values of the fly heterogeneity parameter  $\frac{A_\Delta}{A}$  (solid-red  $\frac{A_\Delta}{A} = 0.2$  and dashed-red line  $\frac{A_\Delta}{A} = 0.4$ ). (d) The relationship between coverage and fly killing efficacy of traps,  $\eta$ , for attaining the 20 ATP threshold. The vertical black line in (a) - (d) show the values of inter-trap distance, coverage and number of traps required to cross the ATP threshold, while the horizontal dashed line in (d) corresponds to a trap fly killing efficacy of 70%, the value of efficacy used for (a)-(c). Importantly, the efficacy and coverage values in the region above the orange curve in (d) will result in the ATP threshold reached within a year. Each trap has a capture radius of 200 m and the study site for this figure is Masaloa.

417

## 418 Spatial heterogeneity in fly distribution, EWT coverage, and ATP

419 We used the ratio  $A_\Delta/A$  as a measure of spatial heterogeneity in the distribution of the fly population at a  
 420 given site (total area with no flies  $A_\Delta$  over total area  $A$ ) to calculate the number of traps required to achieve a  
 421 desired coverage under the heterogeneous fly biting scenario. Equation 3 implies that the number of traps to  
 422 meet a given coverage decreases as the fly population heterogeneity  $A_\Delta/A$  parameter increases for a village  
 423 with area  $A$ . This outcome can be seen in Figure 4(c) for two values of fly distribution heterogeneity

424 parameter  $\frac{A_{\Delta}}{A} = (0.2, 0.4)$  and assuming an area of  $1 \text{ km}^2$  for Masaloo. However, in general, the number of  
425 traps required to achieve the same coverage for a given trap fly killing efficiency is driven by values of  $A_{\Delta}$  and  
426  $A$ , the village size, and both the trapping or attractant radius and between trap distance. This can be seen  
427 from the results given in Table 1, which shows firstly that for a given mix of trapping radius and inter-trap  
428 distance, the number of traps a village requires to meet the same coverage will decrease as heterogeneity  
429 increases. Secondly, for a given fly distribution, the number of traps required to meet a particular coverage  
430 will also decrease with increasing trapping radius and inter-trap distance. On the other hand, while the  
431 number of traps required to achieve the higher coverage of 90-100% will be greater than for achieving the  
432 lower 60-70% coverage for all values of biting fly distributions, these can be placed at smaller inter-trap  
433 distances to attain the increased coverage for the same trap efficiency. Finally, these calculations also provide  
434 a guide as to the feasibility of using EWT as a vector control measure in different settings varying in areal size  
435 and fly distribution. Thus, while in smaller sized village settings, eg. in the case of the 1 or 5  $\text{km}^2$  areas studied  
436 here, the number of traps required to attain a coverage of 60-70% can be as low as 1 to 25 when the trapping  
437 radius and biting heterogeneity is highest (i.e. for 200m and  $\frac{A_{\Delta}}{A} = 0.8$ ), these can be as high as 86 to 98 for the  
438 same conditions and trap killing efficiency in the largest area (i.e.  $10 \text{ km}^2$ ) examined (Table 1). Although  
439 these predictions are for the simplified rectangular areal case, they do suggest that feasibility considerations  
440 might limit the use of traps alone in large areal settings, especially when trap capture radius is low and high  
441 coverages are required even in the case when fly biting heterogeneity is substantial (eg. for radius of 100m,  
442  $\frac{A_{\Delta}}{A} = 0.8$ , and village size of  $10 \text{ km}^2$ , the number of traps to attain 90-100% coverage can be as high as 573-  
443 637 (Table 1)).

#### 444 [Projected impacts of EWT and MDA on intervention durations for achieving parasite](#) 445 [elimination](#)

446 Next, the seasonal MBR-based transmission model was coupled with EWT field deployment configurations  
447 and either annual or switch MDA for simulating the timelines needed to reach the two elimination thresholds  
448 investigated. The baseline models identified for each of the 4 study villages were used to further evaluate

449 different EWT temporal deployments, viz. traps placed monthly, before and during the peak biting season,  
450 used alongside either of the MDAs in these simulations. The area of the simulation village is assumed to be  
451  $1 \text{ km}^2$  while the trap capture radius and fly killing efficiency is set to 200 m and 75% in all the simulations.  
452 Simulations were run for both the homogeneous versus heterogeneous fly biting scenarios. All the  
453 simulations were also carried out using a MDA coverage of 80%, while the EWT coverage was varied. Note  
454 also that given we identify 500 models to provide an adequate representation of the parasite transmission  
455 dynamics in a locality, the intervention durations predicted for an intervention are based on when 95% of  
456 these models cross the 1% Mf and ATP (=20) thresholds respectively in each study site.

457 Figures 5 and 6 show the durations in years required to cross the Mf and ATP elimination thresholds for  
458 annual and switch MDA without (the base case) and with EWT deployed at coverages ranging from 60% -  
459 70% predicted for the village of Masalooa under the homogeneous fly biting scenario – predictions of the  
460 timelines for all four sites for both these MDA regimes alongside various EWT coverages are summarised in  
461 Tables S5 – S9. The number of years of MDA required to cross the thresholds for Masalooa with MDA alone  
462 were found to be as follows: ATP is reached by an average of 12 years with annual MDA, whereas it takes a  
463 mean of 11 years with switch MDA (Figures 5 and 6; Table S5). The corresponding timelines to breach the Mf  
464 threshold are, however, 20 and 15 mean years for each of these MDA regimens (compare Figure 5 (a) versus  
465 6 (a); Table S5). On the other hand, when EWT is deployed monthly together with annual and switch MDA,  
466 the ATP threshold for this village is predicted to be reached in as little as a mean of just 1 year, while the time  
467 to reach the corresponding 1% Mf threshold is reduced to means of 18 and 14 years (Figures 5(b) versus  
468 6(b); Table S5). Interestingly, while the frequency of using EWT (i.e., a month before peak fly biting season,  
469 during the three months of the peak biting season, and monthly throughout the year) had a significant impact  
470 in reducing the timelines in years to breach the ATP threshold for each village, with most savings obtained for  
471 monthly deployment and least in the case of usage just before the peak biting season, this factor did not have  
472 an effect on the years saved with respect to crossing below the Mf threshold (Table S5). Overall, however, the  
473 results indicate that a significant number of intervention years will be saved when EWT is used alongside  
474 MDAs (as opposed to MDA alone), with savings in mean years achieved ranging from 1-17 years in the case of  
475 combined annual MDA (80% coverage)-EWT (60-70% coverage) compared to 1 to 12 years when switch

476 MDA is applied with EWT at the same coverage levels (Table S5). Reducing average EWT coverage (from 65%  
477 to 45%) and hence number of traps in each village will, as expected, significantly reduce these savings in  
478 intervention years (and conversely increase timelines to reaching either threshold), although again this  
479 impact will primarily be seen for the 20 ATP rather than the 1% Mf threshold (Tables S6 – S9).

## 480 [The impact of heterogeneous fly distribution on timelines to elimination](#)

481 In the scenario where fly biting is heterogeneously distributed, such as occurring only in the periphery of a  
482 village, the simulations indicate that paradoxically the times required to reach the community-level 1% Mf  
483 and 20 ATP thresholds will be significantly higher than those predicted for the homogeneous setting where  
484 the average biting rate is uniform across the village (Figure 7). Indeed, this simplified approach for  
485 incorporating fly biting heterogeneity reveals a steeply rising nonlinear relationship between the parameter  
486  $\frac{A\Delta}{A}$  and the times to reach both the thresholds. This relationship can be observed from the results displayed in  
487 Figure 7 when EWT at fly killing efficacy ranging between 70 to 80% is deployed monthly at a coverage of 60  
488 to 70%.

489 Figure 8 further depicts the number of years saved by the use of combined EWT and annual MDA compared  
490 to when yearly MDA alone is used in relation to variations in the fly biting heterogeneity and trap coverage.  
491 The results show, firstly, that combining EWT with MDA under both the homogeneous and heterogeneous fly  
492 distribution scenarios will result in significant numbers of years saved for breaching both thresholds in  
493 comparison with using MDA only (Kruswall – Wallis test comparing timelines to the Mf and ATP thresholds  
494 for each of the EWT/MDA scenarios shown in Figure 8 versus MDA alone:  $p < 0.05$  in each case). For the  
495 homogeneous scenario, the mean number of intervention years saved can range from between 7 to 10 years  
496 depending on trap coverage and the threshold target (whether Mf or ATP). By contrast, this can reach as high  
497 as between 10 to 40 years in the case of the heterogeneous fly biting scenario.

498 The results further show that increasing trap coverage from 40-50% to 60-70% will have only a moderate  
499 impact on the number of years saved under the homogeneous biting scenario, particularly in the case when  
500 the 1% Mf threshold is used (Figure 8(a)). By contrast, increasing EWT coverage will add substantially to the



501 number of years saved for both thresholds when the fly population is heterogeneously distributed in a  
502 setting (Figure 8(b)). These results are for Masaloa but similar patterns are also observed for all four study  
503 villages (Tables S10-S14).

Table 1 Relationship between number of traps, trapping radius, inter-trap distance, and heterogeneity in fly biting distribution accounting for size of a setting. Trap fly killing efficiency is 0.7-0.8. Results are from the use of the best-fitting onchocerciasis models for Masaloa.

| R<br>(trapping<br>radius,m) | d<br>(distance<br>between<br>traps,m) | $N_T$ (number of traps to achieve 60-70 percent coverage)  |                               |                               |                               |                              |                               |                               |                               |                              |                               |                               |                               |
|-----------------------------|---------------------------------------|------------------------------------------------------------|-------------------------------|-------------------------------|-------------------------------|------------------------------|-------------------------------|-------------------------------|-------------------------------|------------------------------|-------------------------------|-------------------------------|-------------------------------|
|                             |                                       | Area<br>A= 1 km <sup>2</sup>                               |                               |                               |                               | Area<br>A= 5 km <sup>2</sup> |                               |                               |                               | Area<br>A=10 km <sup>2</sup> |                               |                               |                               |
|                             |                                       | $\frac{A_\Delta}{A}$<br>= 0                                | $\frac{A_\Delta}{A}$<br>= 0.2 | $\frac{A_\Delta}{A}$<br>= 0.4 | $\frac{A_\Delta}{A}$<br>= 0.8 | $\frac{A_\Delta}{A}$<br>= 0  | $\frac{A_\Delta}{A}$<br>= 0.2 | $\frac{A_\Delta}{A}$<br>= 0.4 | $\frac{A_\Delta}{A}$<br>= 0.8 | $\frac{A_\Delta}{A}$<br>= 0  | $\frac{A_\Delta}{A}$<br>= 0.2 | $\frac{A_\Delta}{A}$<br>= 0.4 | $\frac{A_\Delta}{A}$<br>= 0.8 |
| 50                          | 115 – 124                             | 69<br>– 78                                                 | 55<br>– 63                    | 41<br>– 47                    | 14<br>– 16                    | 1706<br>– 1950               | 1365 –<br>1560                | 1024 –<br>1169                | 342<br>– 390                  | 6825<br>– 7800               | 5500<br>– 6235                | 4100<br>– 4680                | 1365<br>– 1560                |
| 100                         | 235 – 256                             | 18<br>– 20                                                 | 14<br>– 16                    | 11<br>– 12                    | 3 – 4                         | 427<br>– 487                 | 342<br>– 390                  | 256<br>– 293                  | 86<br>– 98                    | 1706<br>– 1950               | 1365<br>– 1560                | 1024 –<br>1169                | 342<br>– 390                  |
| 200                         | 490 – 564                             | 5                                                          | 4                             | 3                             | 1                             | 107<br>– 122                 | 86<br>– 98                    | 64<br>– 74                    | 22<br>– 25                    | 427<br>– 487                 | 342<br>– 390                  | 256<br>– 293                  | 86 – 98                       |
|                             |                                       | $N_T$ (number of traps to achieve 90-100 percent coverage) |                               |                               |                               |                              |                               |                               |                               |                              |                               |                               |                               |
| 50                          | 87 – 93                               | 115<br>– 128                                               | 92<br>– 102                   | 69<br>– 77                    | 23<br>– 26                    | 2870<br>– 3200               | 2292<br>– 2550                | 1720<br>– 1910                | 573<br>– 637                  | 11460<br>– 12735             | 9170<br>– 10190               | 6860<br>– 7640                | 2292<br>– 2550                |
| 100                         | 172 –<br>183                          | 29<br>– 32                                                 | 23<br>– 26                    | 18<br>– 20                    | 6 – 7                         | 717<br>– 796                 | 573<br>– 637                  | 430<br>– 478                  | 144<br>– 160                  | 2865<br>– 3184               | 2292<br>– 2550                | 1720<br>– 1910                | 573<br>– 637                  |
| 200                         | 330 –<br>360                          | 7 – 8                                                      | 6<br>– 7                      | 4 – 5                         | 1 – 2                         | 180<br>– 200                 | 144<br>– 160                  | 108<br>– 120                  | 35<br>– 40                    | 717<br>– 796                 | 573<br>– 637                  | 430<br>– 478                  | 144<br>– 160                  |

505 **Impact of EWT and MDA intervention scenarios on elimination and recrudescence**  
506 **probabilities.**

507 Table 2 summarizes the estimated probabilities of achieving either of these outcomes firstly when both  
508 annual MDA and switch MDAs alone are stopped once the 1% Mf threshold is crossed, and no other  
509 interventions are introduced. The results highlight that stopping these MDAs after the 1% Mf threshold is  
510 crossed will result in zero probability of transmission elimination during the immediate 5-year post MDA  
511 stoppage period that corresponds to WHO's recommended PTS period. Following this period, however,  
512 elimination probabilities will increase gradually, such that by year 15 post MDA stoppage, these will reach  
513 moderately high levels ranging from 15-47% (Table 2). Intriguingly, a similar pattern of increasing  
514 recrudescence of infection is also observed as the simulation period extends from 5 years to 15 years post  
515 stoppage of MDA. The results indicate that this negative outcome (increasing recrudescence of transmission  
516 over time post stoppage of MDA) is a direct function of the fact that the fraction of transient model curves (as  
517 noted by the figures following the ~ sign in the table) that arise immediately following the crossing of the 1%  
518 Mf threshold in each study site will decay slowly over time, with larger fractions of these models either  
519 declining gradually to zero or exhibiting positive resurgences by year 15 post MDA stoppage (Table 2).  
520 However, while these patterns are found to occur irrespective of whether annual MDA or switch MDA was  
521 simulated, an interesting finding was that annual MDA performs better than the more intensive switch MDA  
522 strategy for inducing longer term (year 15) transmission elimination whilst correspondingly reducing  
523 recrudescence of infection in each site. This appears to be mainly due to the fact that annual MDA generates  
524 lesser transient dynamics in the model outcomes compared to switch MDA (Table 2). Finally, there is some  
525 indication that the long-term probability of resurgence or recrudescence of infection may be related  
526 positively with baseline Mf prevalence, increasing as baseline prevalences increase.

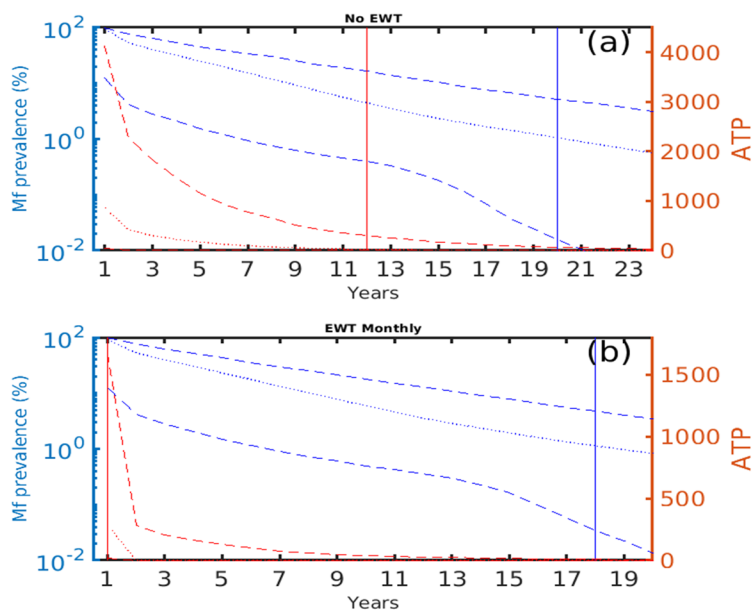

Figure 5. Mean (solid curves) and 95 % confidence intervals (dashed curves) of Mf prevalence (blue) and annual transmission potential-ATP (red) in the study site Masaloo as a function of time when: (a) only annual MDA and (b) annual MDA and monthly EWT are used in the homogeneous fly biting scenario. The times to reach the two thresholds (vertical red (20 ATP) and blue (1% MF prevalence)) are significantly reduced by the use of annual MDA and monthly EWT as compared to MDA alone. Here the EWT coverage is 60% to 70% assuming a trapping radius of 200 meters. The fly killing efficiency of the traps is assumed to be 70% to 80%.

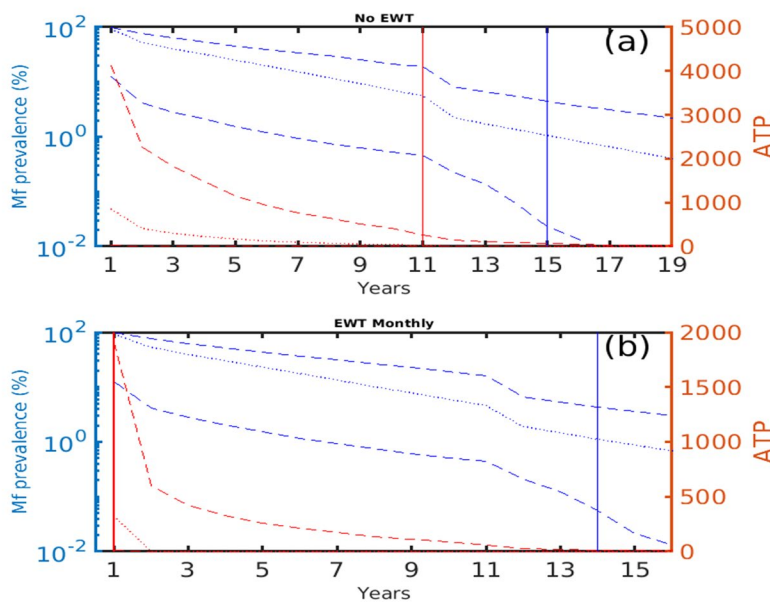

Figure 6. Mean (solid curves) and 95 % confidence intervals (dashed curves) of Mf prevalence (blue) and annual transmission potential-ATP (red) in the study site Masaloo as a function of time when: (a) only switch MDA (annual MDA for 10 years followed by bi-annual MDA) is used, and (b) when switch MDA regime is used in tandem with monthly EWT in the homogeneous fly biting scenario. The times to reach the two thresholds (vertical red line (20 ATP) and blue line (1% MF prevalence)) are significantly reduced as compared to MDA alone. Here the EWT coverage is 60% to 70% assuming a trapping radius of 200 meters. The fly killing efficiency of the traps is assumed to be 70% to 80%.

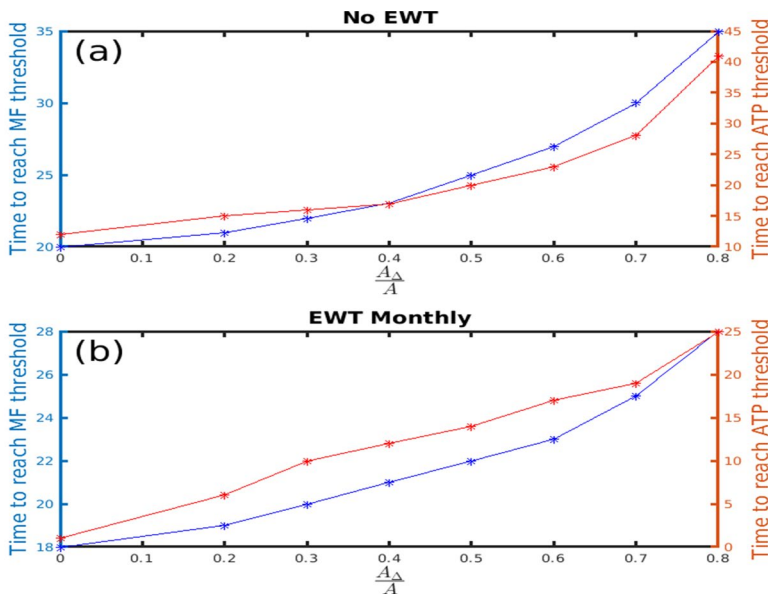

Figure 7. The time to reach the Mf and ATP thresholds as a function heterogeneous biting. Both (a) and (b) show the time to reach Mf elimination (blue curve) and ATP (red curve) thresholds in the study site of Masaloa as a function of time when: (a) annual MDA alone is used, and (b) when annual MDA is used in tandem with monthly EWT. The times to reach the WHO set thresholds increase nonlinearly as biting heterogeneity increases. Here the EWT coverage is 60% to 70% assuming a trapping radius of 200 meters. The fly killing efficacy of traps is 70% to 80%.

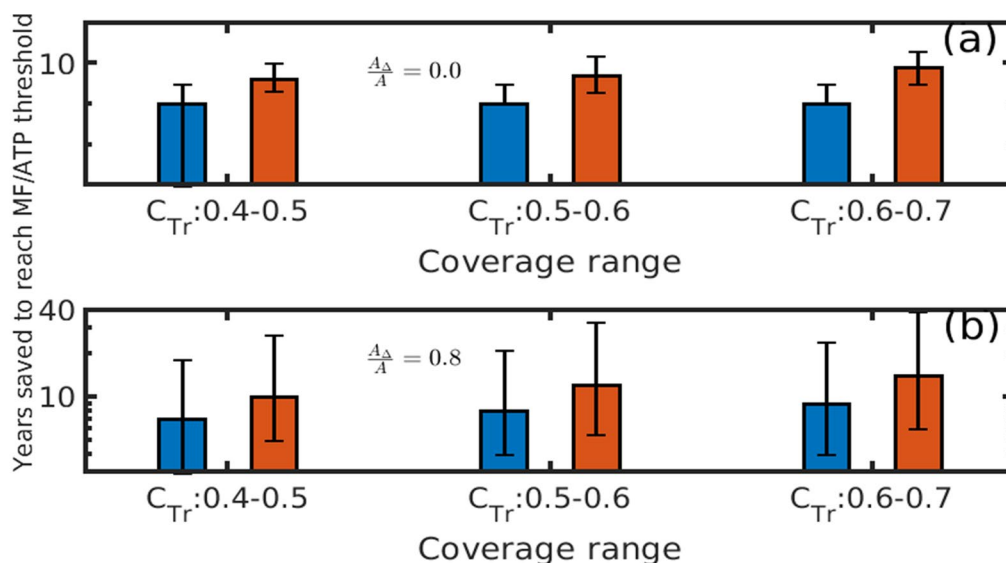

Figure 8. Bar plots indicating years saved in reaching the ATP (red) and Mf (blue) thresholds when EWT is deployed monthly alongside annual MDA in comparison with the use of annual MDA alone for increasing coverage values in the (a) homogenous fly biting case and (b) for the heterogeneity factor  $\frac{A\Delta}{A} = 0.8$ . The results in shows that the combined use of traps and yearly MDA increases the number of years saved in reaching Mf and ATP thresholds for a given coverage compared to when using MDA only. For the homogeneous scenario in (a), the mean number of intervention years saved range from between 7 to 10 years depending on trap coverage and the threshold target (whether Mf or ATP). By contrast, this reaches as high as between 10 to 20 years in the case of the heterogeneous fly biting scenario as shown in (b). Note that the y-axis is shown on a log scale. The study site is Masaloa. The killing efficacy of traps is 70% to 80%.

529 The corresponding effects of including EWT post-stoppage of MDA when deployed monthly either during the  
530 peak biting season or throughout the year for a moderate level of mean trap fly killing efficacy (75%) and  
531 coverage (65%) configuration on transmission elimination/recrudescence are shown for each of the four  
532 villages in Tables 3-4 (see Tables S15, S16 for results for high efficacy and coverage EWT). The predictions  
533 indicate that in contrast to when EWT is not introduced (Table 2), the deployment of these traps following  
534 the stoppage of MDAs will dramatically increase long-term onchocerciasis transmission elimination whilst  
535 significantly suppressing the probability of recrudescence over both the short as well as longer-terms. Thus,  
536 the inclusion of the traps will generate very high elimination probabilities (up to as high as 97%) but only if  
537 they are deployed over the long-term (15 years in the present simulations), with the period immediately post  
538 stoppage of MDA marked by significant transient dynamics (with between 96% to 100% of curves exhibiting  
539 this feature during the first 5 years post MDA stoppage). Importantly, these results do not differ appreciably  
540 whether monthly EWT is deployed only during the peak biting season or annually (compare Table 3 versus  
541 4), although slightly higher probabilities of transmission elimination result when traps are deployed  
542 monthly. Increasing the fly killing efficacy and coverage of EWT to levels as high as a mean of 95% for each of  
543 these control parameters will have the strongest impact in reducing the recrudescence probability to 0 at  
544 both 5- and 15-years post MDA, while increasing the long-term probability of transmission elimination to as  
545 high as 99% (Tables S15, S16). This latter finding implies that deploying just 7-8 EWT traps during the peak  
546 biting season in a village of size  $1 \text{ km}^2$  will be sufficient to suppress high probability recrudescence and  
547 achieve long-term high probability transmission elimination. A further notable feature of the results  
548 displayed in Tables 3 and 4 is that the deployment of EWT after the stoppage of MDA may suppress  
549 resurgence of infection uniformly across all the study sites, i.e. irrespective of baseline infection prevalences.  
550 These results are for the homogeneous fly biting case; except for increased timelines to cross the 1%  $M_f$   
551 threshold, qualitatively the same elimination/recrudescence patterns were also observed for the  
552 heterogeneous biting case.

Table 2. Transmission elimination and recrudescence probabilities estimated for each study site 5 and 15 years after stoppage of annual and switch MDA regimes. The transient behavior as described in the methods section is indicated by the ~ sign.

| Study Villages<br>(baseline Mf<br>prevalence (%)) | Annual MDA upto 1% WHO threshold                                 |                             |                |                               |                |
|---------------------------------------------------|------------------------------------------------------------------|-----------------------------|----------------|-------------------------------|----------------|
|                                                   |                                                                  | Elimination probability (%) |                | Recrudescence probability (%) |                |
|                                                   | Time to cross<br>threshold<br>(year)                             | After 5 years               | After 15 years | After 5 years                 | After 15 years |
| PalaurePacunaci<br>(100)                          | 25                                                               | 0 (~68)                     | 42 (~14)       | 32                            | 44             |
| Masaloa (76)                                      | 20                                                               | 0 (~72)                     | 47 (~24)       | 18                            | 29             |
| Nyimanji (58)                                     | 18                                                               | 0 (~80)                     | 36 (~26)       | 20                            | 38             |
| OlimbuniAroga<br>(24)                             | 15                                                               | 0 (~89)                     | 41 (~31)       | 11                            | 28             |
|                                                   | Annual MDA upto 10 years then Biannual MDA upto 1% WHO threshold |                             |                |                               |                |
|                                                   |                                                                  | Elimination probability (%) |                | Recrudescence probability (%) |                |
|                                                   |                                                                  | After 5 years               | After 15 years | After 5 years                 | After 15 years |
| Palaure Pacunaci                                  | 18                                                               | 0 (~73)                     | 25 (~27)       | 27                            | 47             |
| Masaloa                                           | 15                                                               | 0 (~88)                     | 29 (~39)       | 12                            | 32             |
| Nyimanji                                          | 14                                                               | 0 (~85)                     | 19 (~42)       | 15                            | 39             |
| Olimbuni Aroga                                    | 11                                                               | 0 (~93)                     | 15 (~57)       | 7                             | 28             |

553

554

555

556

*Table 3. Elimination and recrudescence probabilities estimated for each study site 5 and 15 years after stoppage of the switch MDA regime (10 years annual and then biannual MDA for the remaining time until the 1 % Mf threshold is crossed). Here EWT fly killing efficacy is 0.75 (0.7 – 0.8) while coverage is 0.65(0.6 – 0.7). EWT is deployed monthly during the peak biting season. Transient behavior of models as described in the methods section is indicated by the ~ sign.*

| Study Villages   | <b>Annual MDA upto the 1% WHO threshold followed by monthly EWT during the peak biting season</b>                                |                             |                |                               |                |
|------------------|----------------------------------------------------------------------------------------------------------------------------------|-----------------------------|----------------|-------------------------------|----------------|
|                  |                                                                                                                                  | Elimination probability (%) |                | Recrudescence probability (%) |                |
|                  | Time to cross threshold (year)                                                                                                   | After 5 years               | After 15 years | After 5 years                 | After 15 years |
| Palaure Pacunaci | 25                                                                                                                               | 0 (~96)                     | 85 (~8)        | 4                             | 7              |
| Masaloa          | 20                                                                                                                               | 0 (~100)                    | 94 (~5)        | 0                             | 1              |
| Nyimanji         | 18                                                                                                                               | 0 (~100)                    | 92 (~7)        | 0                             | 1              |
| Olimbuni Aroga   | 15                                                                                                                               | 0 (~100)                    | 95 (~4)        | 0                             | 1              |
|                  | <b>Annual MDA for 10 years plus Biannual MDA upto the 1% WHO threshold followed by monthly EWT during the peak biting season</b> |                             |                |                               |                |
|                  |                                                                                                                                  | Elimination probability (%) |                | Recrudescence probability (%) |                |
|                  |                                                                                                                                  | After 5 years               | After 15 years | After 5 years                 | After 15 years |
| Palaure Pacunaci | 18                                                                                                                               | 0 (~98)                     | 79 (~15)       | 2                             | 6              |
| Masaloa          | 15                                                                                                                               | 0 (~100)                    | 88 (~11)       | 0                             | 1              |
| Nyimanji         | 14                                                                                                                               | 0 (~100)                    | 84 (~15)       | 0                             | 1              |
| Olimbuni Aroga   | 11                                                                                                                               | 0 (~100)                    | 85 (~15)       | 0                             | 0              |



*Table 4. Elimination and recrudescence probabilities estimated for each study sites 5 and 15 years after stoppage of switch MDA regime to reach 1% Mf threshold (10 years annual and then biannual for the remaining time to reach 1 % Mf threshold). Here EWT killing efficacy is 0.75 (0.7 – 0.8) while coverage is 0.65(0.6 – 0.7). EWT is deployed monthly throughout the year. The transient behavior as described in the methods section is indicated by ~ sign.*

| Study Villages   | Annual MDA upto 1% WHO threshold, then continue with monthly EWT throughout the year                                             |                             |                |                               |                |
|------------------|----------------------------------------------------------------------------------------------------------------------------------|-----------------------------|----------------|-------------------------------|----------------|
|                  |                                                                                                                                  | Elimination probability (%) |                | Recrudescence probability (%) |                |
|                  | Time to cross threshold (year)                                                                                                   | After 5 years               | After 15 years | After 5 years                 | After 15 years |
| Palaure Pacunaci | 25                                                                                                                               | 0 (~98)                     | 89 (~7)        | 2                             | 4              |
| Masaloa          | 20                                                                                                                               | 0 (~100)                    | 95 (~5)        | 0                             | 0              |
| Nyimanji         | 18                                                                                                                               | 0 (~100)                    | 95 (~4)        | 0                             | 1              |
| Olimbuni Aroga   | 15                                                                                                                               | 0 (~100)                    | 97 (~3)        | 0                             | 0              |
|                  | Annual MDA upto 10 years then Biannual MDA upto 1% WHO threshold, then continue with monthly EWT monthly EWT throughout the year |                             |                |                               |                |
|                  |                                                                                                                                  | Elimination probability (%) |                | Recrudescence probability (%) |                |
|                  |                                                                                                                                  | After 5 years               | After 15 years | After 5 years                 | After 15 years |
| Palaure Pacunaci | 18                                                                                                                               | 0 (~99)                     | 84 (~12)       | 1                             | 4              |
| Masaloa          | 15                                                                                                                               | 0 (~100)                    | 91 (~9)        | 0                             | 0              |
| Nyimanji         | 14                                                                                                                               | 0 (~100)                    | 89 (~11)       | 0                             | 0              |
| Olimbuni Aroga   | 11                                                                                                                               | 0 (~100)                    | 92 (~8)        | 0                             | 0              |

557

558

## 559 Discussion

560 The Esperanza Window Trap (EWT) is a recent addition to community-directed VC approaches which  
561 empirical field studies have shown could serve as a means for bringing about significant reductions of  
562 *Onchocerca*-transmitting black flies (25, 26, 28, 30, 31). Further, it has been demonstrated that EWT can be  
563 deployed effectively by community members such that it could also constitute a measure for overcoming the  
564 problems of implementing the sustained long-term black fly control required to meet the endgame challenges  
565 of achieving onchocerciasis eradication (21, 34). However, currently no study exists where the combined  
566 effects of MDA and EWT have been investigated for reducing infection in both the vector and human  
567 populations to levels that can result in the achievement of community-wide transmission elimination of the  
568 parasite. EWT deployment at the village/site scale for achieving black fly control also requires understanding  
569 of the factors that will underlie the configuration of the trap in the field, including the density of traps and  
570 where to place them, needed to bring about optimal area-wide fly reduction in a given landscape (33). Here  
571 we have sought for the first time to shed light on this central issue connected to the significance of using EWT  
572 as a transmission elimination tool by adapting and coupling a population-level model of onchocerciasis  
573 transmission with models of various EWT trap networks deployable in the field. More specifically, we used  
574 the developed trap network-onchocerciasis transmission modeling system to address how operational  
575 parameters connected with the field deployment of EWT, such as efficacy of traps in trapping and killing  
576 *Simulium* flies, number of traps and coverage of a setting, inter-trap distance, capture radius, and  
577 heterogeneity in fly distribution in a community (33, 58), may affect the abundance of the Simulid fly  
578 population, and in combination with reductions in human infection brought about by MDA, can contribute to  
579 the community-wide elimination of onchocerciasis transmission.

580 Our first analysis in this work examined the feasibility of using EWT to eliminate parasite transmission from  
581 the black fly population in a community, focusing on the number of traps required to achieve this goal under  
582 various trap network parameters, transmission conditions, and areal settings (Figure 4, Table 1). Our  
583 simulations highlight that while the ATP threshold of 20 infective bites per person per year may indeed be  
584 effectively breached quickly (even within a year) through the monthly deployment of EWT traps when these

585 are arranged in a rectangular array in a community (the results shown in Figure 4 and Table 1 reflecting the  
586 outcomes predicted for the meso-endemic village of Masaloa although similar results were obtained for the  
587 other three study sites), the numbers of traps required to actually achieve this goal will vary as a complex  
588 function of trap fly killing efficacy, trapping radius, inter-trap distance, fly biting heterogeneity and size of a  
589 setting. Thus, for example, if the trapping radius of a trap and inter-trap distance are large (such as the 200m  
590 and 490-564m investigated here), the number of traps given a homogeneous fly biting scenario and a fly  
591 killing efficacy of 70-80%, for achieving the ATP threshold by means of a moderately high trap coverage (60-  
592 70%) and monthly trap placements for a year, can vary from as little as just 5 in a small size setting ( $1 \text{ km}^2$ )  
593 to as high as 487 in the case of a large size community ( $10 \text{ km}^2$ ) (Table 1). These numbers will increase with  
594 coverage, eg. to 8 and up to 796 for this same scenario if the trap coverage is increased to levels as high as 90-  
595 100%. A key finding, however, is that as spatial heterogeneity in fly biting increases, the number of traps  
596 required to achieve the same goal will decrease significantly compared to the homogeneous biting case,  
597 although even at the highest trap radius/inter-trap distance studied here up to 98 traps will still be required  
598 (at the 60-70% coverage level) to cross the ATP threshold at the most heterogeneous situation modelled (ie.  
599  $\frac{A_A}{A} = 0.8$ ) in the largest area examined here ( $10 \text{ km}^2$ ) (Table 1). The results displayed in Table 1 also indicate  
600 that the number of traps needed to achieve the ATP threshold is highly sensitive to trap capture or fly  
601 attractant radius and may become infeasibly high if this radius, and hence the inter-trap distance, decreases  
602 to low levels.

603 Another important result in this regard which has major implications for the design of effective EWT trapping  
604 networks is that the trap coverage (and therefore number of traps) needed to cross the 20 ATP threshold via  
605 placement of traps every month for a year is found to depend strongly on the trap fly killing efficacy (Figure  
606 4d). Thus, while an efficacy of 70% will require a trap coverage of just over 60% for a trap network consisting  
607 of traps with a capture radius of 200m, placed every 490m, and deployed in a setting of size  $1 \text{ km}^2$ , much  
608 higher coverages will need to be achieved to meet the goal of achieving this target within a year if the fly  
609 killing efficacy drops below 70% (Figure 4d). Indeed, there is a critical fly killing efficacy (approximately  
610 45%) below which the ATP threshold cannot be achieved within a year even at maximal coverage, indicating  
611 the strong sensitivity of the trap network to the fly killing efficacy of the trap.

612 These predictions highlight on the one hand the inadequacy of simply transferring evidence regarding fly  
613 killing effectiveness based on restricted field trials for evaluating the utility of using EWT for bringing about  
614 area- or community-wide interruption of transmission from the vector population. Indeed, our results show  
615 that such evaluations must be made only by considering the effects of a given EWT trapping configuration or  
616 network on parasite transmission dynamics, including the biting distribution of the vector, in a locality. These  
617 results also underscore that high trap coverages, and thus infeasibly high trap numbers, will be required to  
618 achieve vector-based elimination targets rapidly, which might limit the use of EWT traps if only much lower  
619 coverages can be attained from using fewer traps and longer inter-trap distances (see Table 1 for a  
620 comparison of the number of traps needed at 60-70% and 90-100% coverages for different trap capture  
621 radii). This, however, will lengthen the timelines required to attain the ATP elimination target used in the  
622 present simulations.

623 By contrast, the simulations of including EWT with MDA on the timelines required to reach the 20 ATP and  
624 1% Mf thresholds investigated here using our MBR seasonality incorporated onchocerciasis transmission  
625 model demonstrate that both of these thresholds can be achieved faster by coupling MDA strategies with  
626 EWT compared to using MDAs alone (Figures 5-8 and Tables S5-S14). Overall, including EWT in the MDAs  
627 (for trap killing efficacy of 75%, capture radius of 200m and MDAs delivered at a coverage of 80% in a setting  
628 covering an area of 1  $km^2$  and experiencing homogeneity in fly biting) can potentially save between 1-12  
629 years across the 4 study sites for combined annual MDA/EWT and 1-17 years when EWT is combined with  
630 switch MDA (Table S5). A noteworthy feature of these results is also that the ATP threshold will be achieved  
631 much faster than the corresponding Mf threshold in each village setting (and therefore saving more  
632 intervention years if used as a target) when EWT is coupled with either of the MDA strategies irrespective of  
633 the biting fly distribution in a setting (Figure 8). As we have shown previously this outcome is primarily a  
634 function of the shorter life span of parasite larval stages and greater susceptibility of filarial vectors to VC  
635 measures compared to the markedly longer life expectancy and comparatively lesser susceptibility of the  
636 adult parasite populations residing in human hosts to drug treatments (34, 35). Note also, as we have  
637 highlighted previously (34), while this result indicates that targets based on infection indicators in the vector  
638 (ATP) may be significantly more sensitive for early detection of transmission interruption, MDA will still be

639 important for reducing the intensity of the remaining worm infections in humans in order to achieve the  
640 permanent reduction of transmission especially in settings where in-migration of black flies is thought to be  
641 very likely.

642 A related significant finding is that while the frequency of using EWT (viz. a month before peak fly biting  
643 season, during the three months of the peak biting season, and monthly throughout the year) has little impact  
644 on the predicted timelines required to achieve the Mf threshold, using monthly deployment of EWT alongside  
645 the two MDAs modelled here by contrast can significantly reduce the years required to breach the ATP  
646 threshold compared with using MDA alone (Figures 5-8; Tables S5-S14). This outcome was observed  
647 irrespective of the fly biting variation, but an unanticipated finding is that times to reach both the 1% Mf and  
648 20 ATP thresholds were found to increase for all interventions, including in the case of inclusion of EWT with  
649 MDA, as fly biting heterogeneity in a setting increases (Figure 7). This is because the spatial heterogeneity in  
650 vector biting as modelled here implies markedly higher than average densities of biting flies in certain  
651 sections of a community or village, which will accordingly translate to requiring longer times to breach the  
652 community-wide aggregated ATP and Mf elimination thresholds. On the other hand, high levels of vector  
653 control coverage can be achieved in the heterogeneous biting scenario by using lower number of traps as  
654 compared to the corresponding homogeneous setting. This is because placing the traps where flies are  
655 concentrated rather than everywhere saves resources in terms of trap numbers without compromising on  
656 coverage. However, a subtle but critical finding in this regard is that while increasing EWT coverage will only  
657 have moderate effects in the homogeneous biting case, achieving high coverages in those areas where most  
658 infective vector biting occurs will add substantially to the number of years saved for both thresholds (Figure  
659 8(b)). This finding will increase the feasibility of using EWT as a control measure for accelerating  
660 onchocerciasis elimination, but it will require baseline surveys of fly biting habitats within a setting to be  
661 performed before deploying an effective EWT configuration (number of traps, inter-trap distance) for a  
662 location of a specific size.

663 However, in general, the finding overall in this study of a nonlinear association between the number of traps  
664 required, fly biting distribution, coverage and areal size on timelines to reach the two thresholds studied for a

665 given trap fly killing efficacy, capture radius and inter-trap distance means that: 1) trap numbers will not  
666 scale linearly with changes in areal size, ie. the number of traps used in a site will not translate simply to  
667 twice the number required for another site with double the area, and 2) the number of traps required will  
668 vary between sites with different areas even when they exhibit the same fly distribution pattern. This  
669 outcome again highlights the importance of considering the interaction between a given trap configuration  
670 and parasite population dynamics in settings varying in spatial fly biting patterns when evaluating the  
671 effectiveness of using EWT with MDA for progressing the meeting of set elimination targets.

672 Our third major result from this study pertains to simulations of the impact of adding EWT to MDA regimens  
673 for sustaining long-term transmission elimination once the community-wide 1% Mf threshold is crossed and  
674 MDA is stopped fully. This is becoming a critical topic of study given findings from both field and modeling  
675 studies which indicate that achieving these or similar thresholds may not lead to interruption of transmission  
676 in every setting (9, 60). More recent modeling studies also suggest that this outcome may intriguingly reflect  
677 the emergence of transient dynamical behavior near elimination thresholds, which could result in long-term  
678 low-level persistence of filarial parasitic systems (59). To imitate the current MDA interventions and these  
679 endgame questions that have emerged regarding ensuring that long-term elimination of transmission is  
680 sustained, we introduced EWT only after the 1% Mf threshold is crossed and MDA is stopped and again  
681 compared annual versus switch MDA strategies in this exercise. The results shown in Tables 2-4 and in Tables  
682 S15 and S16 highlight firstly the profound impact that introduction of EWT into either MDAs can have in  
683 enhancing the achievement of sustainable transmission elimination especially when EWT is implemented  
684 long-term compared to when no further interventions, including EWT, is introduced once MDAs are stopped.  
685 Thus, while long-term application (at least for 15 years) of EWT at even at moderate efficacy  
686 (75%)/coverage (65%) levels can result in in very high elimination probabilities (up to 94%) in the study  
687 villages when deployed monthly during the peak biting season (Table 3) and up to as high as 97% (much  
688 higher if higher efficacy and coverage levels are used (Tables S15, S16)) when used on a monthly basis (Table  
689 4), the corresponding probabilities of transmission elimination achieved in the absence of EWT will only  
690 increase to 15-47% by year 15 post MDA stoppage with significant resurgences of infection predicted at both  
691 5 and 15 years post MDA depending on the MDA regimen and village (Table 2). A further significant finding of

692 import is that zero elimination is predicted for all the strategies with and without inclusion of EWT modelled  
693 here at year 5 post-MDA (Tables 2-4), largely because of the induction of transient transmission dynamics  
694 (majority of model curves exhibiting fluctuating low-level declines and increases in infection (59))  
695 immediately following the crossing of the 1% Mf threshold.

696 These results imply firstly that while on the one hand deploying EWT even at moderate efficacy/coverage  
697 levels post MDA can increase onchocerciasis elimination probabilities whilst suppressing recrudescence of  
698 infection once the 1% Mf threshold is crossed compared to the situation when EWT is not implemented, this  
699 impact will only become apparent when EWT is implemented long-term after the crossing of this threshold.  
700 The finding of transient behavior immediately following the crossing of the 1% Mf threshold further implies  
701 that while infection levels may remain at low levels - even below the 1% Mf value - during the short term (for  
702 at least 5 years) after MDA is stopped, there will still be a possibility of significant resurgence of infection over  
703 the longer-term in the absence of VC measures, such as EWT. This outcome, ie a delayed resurgence of  
704 infection once the transient period passes, has major implications for post elimination surveillance. It  
705 suggests that such surveillance will need to be extended beyond the currently proposed PTS/PES periods  
706 (43) to facilitate a more reliable assessment of transmission stoppage in a setting especially when no VC  
707 measures are deployed during the post-MDA period (59). A final point of interest regarding the results arising  
708 from the deployment of EWT after the stoppage of MDA is that it will also overcome the impact of baseline  
709 endemicity levels by suppressing the resurgence of infection uniformly across sites differing in these initial  
710 transmission conditions (Tables 3, 4). As remarked previously (36, 46, 61), this outcome indicates how  
711 including VC measures during the endgame phase of an elimination program can have the additional  
712 important effect of overcoming the inherent between-site heterogeneity in parasite transmission dynamics,  
713 affording thereby a more reliable strategy for bringing about filarial transmission elimination across  
714 disparate localities.

715 On a more epistemological level, our results have provided additional elaborations of the role that  
716 mathematical models which can integrate elements of an intervention with parasite transmission dynamics  
717 can play in generating genuinely new knowledge regarding how a specific intervention would serve to meet a

718 set population-wide disease management goal (45, 62). In particular, here, we have demonstrated how  
719 primary information or hypothesis about the efficacy of EWT traps in reducing the black fly population  
720 obtained through focused field observations can be extended through our coupled EWT-onchocerciasis  
721 transmission model into producing higher-order insights regarding the use of EWT traps in a community for  
722 meeting set elimination thresholds, and following this for bringing about long-term sustainable transmission  
723 elimination. The new information gleaned from these simulations regarding the specifics of the trap network  
724 or configuration (number of traps, impacts of fly killing efficacy, trap capture radius, inter-trap distance and  
725 placement of traps over space and time taking into account vector biting distribution and seasonality)  
726 represent critical variables for meeting these goals effectively, which are often not fully explored or are  
727 challenging to examine using empirical studies alone. This ability of mathematical models, especially when  
728 used in conjunction with methods (such as the BM methodology used here) to assimilate information  
729 regarding local transmission conditions, to extend the evidence from one set of observations, ie. from field  
730 studies regarding the effectiveness of the EWT for reducing fly abundance at a particular spatial and temporal  
731 scale, for the generation of novel higher-order out-of-sample predictions about other variables and processes  
732 related to the overall operation of a dynamical system via the structures and parameters of a transmission  
733 model indicates on the one hand the limitations of making inferences based on restricted empirical data  
734 alone. Conversely, the results underscore the value of coupling structurally appropriate parasite transmission  
735 models with such data for allowing a more comprehensive and reliable assessment of the potential of an  
736 intervention, including guiding its optimal design, for facilitating community-wide parasite control across  
737 disparate endemic settings.

738 Our coupling of EWT trap network configurations with the seasonal MBR-based onchocerciasis transmission  
739 model has also presented new modeling constructs for how to incorporate the effects of variable spatio-  
740 temporal processes into a population-level vector borne macroparasite transmission model. In particular, we  
741 show how rainfall-driven seasonality in black fly biting abundance and how spatial heterogeneity in such  
742 abundances that may occur in landscapes of varying areal sizes can be structurally integrated with a  
743 population-level onchocerciasis model to gain more realistic insights of the impacts of control efforts to  
744 achieve the elimination of the transmission of *O. volvulus* in the field. The formulations by which we



745 incorporate these heterogeneities into our base onchocerciasis transmission model as described in this paper  
746 (see specifically the text around Equation 8) thus constitute major innovations in enhancing the capabilities  
747 of data-driven population-level deterministic models for advancing investigations of the complex  
748 transmission and control dynamics of macroparasitic diseases in the real-world. We indicate that similar  
749 extensions could also be conceptualized and implemented into population-level parasite transmission models  
750 for other macroparasitic diseases, which would allow leveraging of their higher tractability and simplicity (as  
751 compared to stochastic or individual-based models) whilst improving their capability to handle the complex  
752 spatio-temporal heterogeneities, such as those addressed in this work, that are very likely to underlie the  
753 real-world disease transmission and extinction dynamics in the field.

754 A limitation to our study is that the exact form of the potential fly biting distribution in communities is not  
755 addressed explicitly. The general principles regarding trap placement and numbers given trap fly killing  
756 efficacy and coverage discussed in this paper can be expanded to include more realistic spatial distribution  
757 functions for the biting black fly population, although the analysis will be mathematically involved (33). The  
758 most common approach to trap deployment, as modelled here, is to place traps on a regular grid of cells  
759 across a spatial domain, but if sites most likely to result in catches of established or invading black flies are  
760 known, then it might be possible to set the traps in these optimal fly habitats. Research studies will be  
761 required to determine such optimal habitats for trap placement to take advantage of the lower trap numbers  
762 that would be required in such circumstances. Furthermore, given that the number of traps required to form  
763 an effective attractant-based trap network is strongly sensitive to trap insect-killing efficacy and fly capture  
764 radius, future empirical work to quantify these parameters for different lures, including how these will  
765 change as lures age, is needed. The movement of flies over a landscape is another area where the present  
766 modeling system can be made more realistic. If better data becomes available on black fly dispersal behavior,  
767 then it might be possible to include a movement model for the fly population in our EWT simulation system  
768 (63, 64), although if the dispersal behavior is also affected by host physiology and mobility as well as by  
769 habitat patchiness in a setting then it might call for the extension of the present models into more spatially-  
770 explicit simulation systems, such as the agent-based vector-borne disease modeling frameworks being  
771 investigated for onchocerciasis by other authors (39). Finally, we have used elimination targets initially

772 proposed by WHO (WHO, 2016) in all the simulations carried out in this work. Our previous modeling studies  
773 have indicated that such breakpoints are not global, can vary by endemicity, and may be lower than the  
774 thresholds used here (34, 46, 50), although note that the present threshold values may apply in the presence  
775 of black fly control (34, 46). While this indicates a need for reevaluating and confirming the targets required  
776 for determining whether transmission has been interrupted, the key conclusions of our study, viz. that adding  
777 EWT VC to MDA will significantly reduce timelines to elimination targets, and following this, will enhance the  
778 achievement of sustained long-term transmission elimination compared to MDA alone in communities will  
779 not change although the actual durations over which both goals will be met would (34, 46).

780 **Acknowledgment**

781 E.M. and T.R.U. thank the National Institute of Allergy and Infectious Diseases (<https://www.niaid.nih.gov/> )  
782 for financial support of this study (Grant R01AI123245). The funders had no role in study design, analysis,  
783 decision to publish, or preparation of the manuscript.

784 **Author Contributions**

785 Conceptualization: E.M. and S.B. Formal Analysis: S.B., S.S., W.Z.; M.E.S., E.M. Provided Data: T.R.U. Code  
786 Organization: K.N. Writing- original draft: S.B. and E.M. Writing – review and editing: All authors.

787 **Competing Interests**

788 The authors declare no competing interests.

## 789 **References:**

- 790 1. Lakwo T, Oguttu D, Ukety T, Post R, Bakajika D. Onchocerciasis elimination: progress and challenges.  
791 Research and Reports in Tropical Medicine. 2020;11:81.
- 792 2. Brattig NW, Cheke RA, Garms R. Onchocerciasis (river blindness)–more than a century of research  
793 and control. Acta Tropica. 2021;218:105677.
- 794 3. Colebunders R, Basáñez M-G, Siling K, Post RJ, Rotsaert A, Mmbando B, et al. From river blindness  
795 control to elimination: bridge over troubled water. Infectious Diseases of Poverty. 2018;7(02):81-95.
- 796 4. Debela MB, Kassa DH, Mokannon TM. Prevalence of onchocerciasis infection in the Sub-Saharan  
797 Africa countries: A systematic review and meta-analysis. International Journal of Medicine and Public Health.  
798 2021;11(4):170-8.
- 799 5. Fobi G, Yameogo L, Noma M, Aholou Y, Koroma JB, Zouré HM, et al. Managing the fight against  
800 Onchocerciasis in Africa: APOC experience. PLoS Neglected Tropical Diseases. 2015;9(5):e0003542.
- 801 6. Taylor MJ, Hoerauf A, Bockarie M. Lymphatic filariasis and onchocerciasis. The Lancet.  
802 2010;376(9747):1175-85.
- 803 7. Melchers NVSV, Stolk WA, van Loon W, Pedrique B, Bakker R, Murdoch ME, et al. The burden of skin  
804 disease and eye disease due to onchocerciasis in countries formerly under the African Programme for  
805 Onchocerciasis Control mandate for 1990, 2020, and 2030. PLoS Neglected Tropical Diseases. 2021;15(7).
- 806 8. Fong IW. Mass drug treatment of tropical diseases: is it really progress? Current Trends and  
807 Concerns in Infectious Diseases. 2020:217-39.
- 808 9. Katarwa MN, Lakwo T, Habomugisha P, Unnasch TR, Garms R, Hudson-Davis L, et al. After 70 years  
809 of fighting an age-old scourge, onchocerciasis in Uganda, the end is in sight. International Health.  
810 2018;10(suppl\_1):i79-i88.
- 811 10. World Health Organization. Elimination of human onchocerciasis: Progress report, 2020. Weekly  
812 Epidemiological Record. 2021;96(WER No 46):557-67.
- 813 11. Alley ES, Plaisier AP, Boatman BA, Dadzie KY, Remme J, Zerbo G, et al. The impact of five years of annual  
814 ivermectin treatment on skin microfilarial loads in the onchocerciasis focus of Asubende, Ghana. Transactions  
815 of the Royal Society of Tropical Medicine and Hygiene. 1994;88(5):581-4.
- 816 12. Boatman B. The onchocerciasis control programme in West Africa (OCP). Annals of Tropical Medicine  
817 and Parasitology. 2008;102(sup1):13-7.
- 818 13. Anonymous. Progress toward elimination of onchocerciasis in the Americas—1993–2012. Morbidity  
819 and Mortality Weekly Report. 2013;62(20):405.
- 820 14. Sauerbrey M. The onchocerciasis elimination program for the Americas (OEPA). Annals of Tropical  
821 Medicine and Parasitology. 2008;102(sup1):25-9.
- 822 15. Amazigo U. The African programme for onchocerciasis control (APOC). Annals of Tropical Medicine  
823 and Parasitology. 2008;102(sup1):19-22.

- 824 16. Coffeng LE, Stolk WA, Zoure HGM, Veerman JL, Agblewonu KB, Murdoch ME, et al. African  
825 Programme for Onchocerciasis Control 1995–2015: Model-estimated health impact and cost. *PLoS Neglected*  
826 *Tropical Diseases*. 2013;7(1):e2032.
- 827 17. NTD Modelling Consortium Onchocerciasis Group. The World Health Organization 2030 goals for  
828 onchocerciasis: Insights and perspectives from mathematical modelling. *Gates Open Research*. 2019;3:1545.
- 829 18. Gebrezgabiher G, Mekonnen Z, Yewhalaw D, Hailu A. Reaching the last mile: main challenges relating  
830 to and recommendations to accelerate onchocerciasis elimination in Africa. *Infectious Diseases of Poverty*.  
831 2019;8.
- 832 19. Dadzie Y, Amazigo UV, Boatman BA, Seketeli A. Is onchocerciasis elimination in Africa feasible by 2025:  
833 a perspective based on lessons learnt from the African control programmes. *Infectious Diseases of Poverty*.  
834 2018;7(1):63.
- 835 20. Lambertson PH, Cheke RA, Winskill P, Tirados I, Walker M, Osei-Atweneboana MY, et al.  
836 Onchocerciasis transmission in Ghana: persistence under different control strategies and the role of the  
837 simuliid vectors. *PLoS Neglected Tropical Diseases*. 2015;9(4):e0003688.
- 838 21. Tirados I, Thomsen E, Worrall E, Koala L, Melachio TT, Basáñez M-G. Vector control and  
839 entomological capacity for onchocerciasis elimination. *Trends in Parasitology*. 2022.
- 840 22. Jacob BG, Loum D, Lakwo TL, Katholi CR, Habomugisha P, Byamukama E, et al. Community-directed  
841 vector control to supplement mass drug distribution for onchocerciasis elimination in the Madi mid-North  
842 focus of Northern Uganda. *PLoS Neglected Tropical Diseases*. 2018;12(8):e0006702.
- 843 23. Ndyomugenyi R, Tukesiga E, Buttner DW, Garms R. The impact of ivermectin treatment alone and  
844 when in parallel with *Simulium neavei* elimination on onchocerciasis in Uganda. *Tropical Medicine and*  
845 *International Health*. 2004;9(8):882-6.
- 846 24. Verver S, Walker M, Kim YE, Fobi G, Tekle AH, Zoure HGM, et al. How can onchocerciasis elimination  
847 in Africa be accelerated? Modeling the impact of increased Ivermectin treatment frequency and  
848 complementary vector control. *Clinical Infectious Diseases*. 2018;66(suppl\_4):S267-S74.
- 849 25. Hendy A, Sluydts V, Tushar T, De Witte J, Odonga P, Loum D, et al. Esperanza Window Traps for the  
850 collection of anthropophilic blackflies (Diptera: Simuliidae) in Uganda and Tanzania. *PLoS Neglected Tropical*  
851 *Diseases*. 2017;11(6):e0005688.
- 852 26. Rodríguez-Pérez MA, Adeleke MA, Burkett-Cadena ND, Garza-Hernández JA, Reyes-Villanueva F,  
853 Cupp EW, et al. Development of a novel trap for the collection of black flies of the *Simulium ochraceum*  
854 complex. *PLoS ONE*. 2013;8(10):e76814.
- 855 27. Toé LD, Koala L, Burkett-Cadena ND, Traoré BM, Sanfo M, Kambiré SR, et al. Optimization of the  
856 Esperanza window trap for the collection of the African onchocerciasis vector *Simulium damnosum* sensu lato.  
857 *Acta Tropica*. 2014;137:39-43.
- 858 28. Loum D, Katholi CR, Lakwo T, Habomugisha P, Tukahebwa EM, Unnasch TR. Evaluation of  
859 community-directed operation of black fly traps for entomological surveillance of *Onchocerca volvulus*

- 860 transmission in the Madi-Mid North focus of onchocerciasis in Northern Uganda. *The American Journal of*  
861 *Tropical Medicine and Hygiene*. 2017;97(4):1235.
- 862 29. Sawadogo SP, Nikièma AS, Coulibal S, Koala L, Niang A, Bougouma C, et al. Community  
863 implementation of human landing and non-human landing collection methods for *Wuchereria bancrofti*  
864 vectors. *Journal of Parasitology and Vector Biology*. 2021;13(1):41-50.
- 865 30. Rodríguez-Pérez MA, Garza-Hernández JA, Salinas-Carmona MC, Fernández-Salas I, Reyes-Villanueva  
866 F, Real-Najarro O, et al. The esperanza window trap reduces the human biting rate of *Simulium ochraceum* sl  
867 in formerly onchocerciasis endemic foci in Southern Mexico. *PLoS Neglected Tropical Diseases*.  
868 2017;11(7):e0005686.
- 869 31. Loum D, Cozart D, Lakwo T, Habomugisha P, Jacob B, Cupp EW, et al. Optimization and evaluation of  
870 the Esperanza Window Trap to reduce biting rates of *Simulium damnosum* sensu lato in Northern Uganda.  
871 *PLoS Neglected Tropical Diseases*. 2019;13(7):e0007558.
- 872 32. Talom BAD, Enyong P, Cheke RA, Djouaka R, Hawkes FM. Capture of high numbers of *Simulium*  
873 vectors can be achieved with Host Decoy Traps to support data acquisition in the onchocerciasis elimination  
874 endgame. *Acta Tropica*. 2021;221:106020.
- 875 33. Manoukis NC, Hall B, Geib SM. A computer model of insect traps in a landscape. *Scientific Reports*.  
876 2014;4(1):7015.
- 877 34. Smith ME, Bilal S, Lakwo TL, Habomugisha P, Tukahebwa E, Byamukama E, et al. Accelerating river  
878 blindness elimination by supplementing MDA with a vegetation “slash and clear” vector control strategy: A  
879 data-driven modeling analysis. *Scientific Reports*. 2019;9(1):1-13.
- 880 35. Singh BK, Michael E. Bayesian calibration of simulation models for supporting management of the  
881 elimination of the macroparasitic disease, Lymphatic Filariasis. *Parasites and Vectors*. 2015;8(1):522.
- 882 36. Smith ME, Singh BK, Michael E. Assessing endgame strategies for the elimination of lymphatic  
883 filariasis: A model-based evaluation of the impact of DEC-medicated salt. *Scientific Reports*. 2017;7.
- 884 37. Hagen DR, White JK, Tidor B. Convergence in parameters and predictions using computational  
885 experimental design. *Interface Focus*. 2013;3(4).
- 886 38. Parker WS. Evidence and knowledge from computer simulation. *Erkenntnis*. 2022;87:1521-38.
- 887 39. Coffeng LE, Stolk WA, Hoerauf A, Habbema D, Bakker R, Hopkins AD, et al. Elimination of African  
888 Onchocerciasis: Modeling the impact of increasing the frequency of Ivermectin mass treatment. *PLoS ONE*.  
889 2014;9(12).
- 890 40. Michael E, Singh BK, Mayala BK, Smith ME, Hampton S, Nabrzyski J. Continental-scale, data-driven  
891 predictive assessment of eliminating the vector-borne disease, lymphatic filariasis, in sub-Saharan Africa by  
892 2020. *BMC Medicine*. 2017;15(1):1-23.
- 893 41. Turner HC, Walker M, Churcher TS, Basanez MG. Modelling the impact of ivermectin on River  
894 Blindness and its burden of morbidity and mortality in African Savannah: EpiOncho projections. *Parasites and*  
895 *Vectors*. 2014;7.

- 896 42. Walker M, Stolk WA, Dixon MA, Bottomley C, Diawara L, Traore MO, et al. Modelling the elimination  
897 of river blindness using long-term epidemiological and programmatic data from Mali and Senegal. *Epidemics*.  
898 2017;18:4-15.
- 899 43. Cantey PT, Roy SL, Boakye D, Mwingira U, Ottesen EA, Hopkins AD, et al. Transitioning from river  
900 blindness control to elimination: steps toward stopping treatment. *International Health*. 2018;10(suppl\_1):i7-  
901 i13.
- 902 44. WHO/APOC. Conceptual and operational framework of Onchocerciasis elimination with ivermectin  
903 treatment. Ouagadougou, Burkina Faso; 2010. Report No.: WHO/APOC/MG/10.1.
- 904 45. Smith ME, Griswold E, Singh BK, Miri E, Eigege A, Adelamo S, et al. Predicting lymphatic filariasis  
905 elimination in data-limited settings: A reconstructive computational framework for combining data  
906 generation and model discovery. *PLoS Computational Biology*. 2019;16.
- 907 46. Michael E, Smith ME, Singh BK, Katarawa MN, Byamukama E, Habomugisha P, et al. Data-driven  
908 modelling and spatial complexity supports heterogeneity-based integrative management for eliminating  
909 *Simulium neavei*-transmitted river blindness. *Scientific Reports*. 2020;10(1):4235.
- 910 47. Srisuka W, Takaoka H, Otsuka Y, Fukuda M, Thongsahuan S, Taai K, et al. Biodiversity, seasonal  
911 abundance, and distribution of blackflies (Diptera: Simuliidae) in six different regions of Thailand. *Parasites  
912 and Vectors*. 2017;10.
- 913 48. Ya'cob Z, Takaoka H, Pramual P, Low VL, Sofian-Azirun M. Distribution pattern of black fly (Diptera:  
914 Simuliidae) assemblages along an altitudinal gradient in Peninsular Malaysia. *Parasites and Vectors*. 2016;9.
- 915 49. Birch DA, Young WR. A master equation for a spatial population model with pair interactions.  
916 *Theoretical Population Biology*. 2006;70(1):26-42.
- 917 50. Michael E, Smith ME, Katarawa MN, Byamukama E, Griswold E, Habomugisha P, et al. Substantiating  
918 freedom from parasitic infection by combining transmission model predictions with disease surveys. *Nature  
919 Communications*. 2018;9(1):1-13.
- 920 51. Poole D, Raftery AE. Inference for deterministic simulation models: The Bayesian melding approach.  
921 *Journal of the American Statistical Association*. 2000;95(452):1244-55.
- 922 52. Awadzi K, Attah SK, Addy ET, Opoku NO, Quartey BT. The effects of high-dose ivermectin regimens on  
923 *Onchocerca volvulus* in onchocerciasis patients. *Transactions of the Royal Society of Tropical Medicine and  
924 Hygiene*. 1999;93(2):189-94.
- 925 53. Gardon J, Boussinesq M, Kamgno J, Gardon-Wendel N, Demanga-Ngangue, Duke BOL. Effects of  
926 standard and high doses of ivermectin on adult worms of *Onchocerca volvulus*: a randomised controlled trial.  
927 *Lancet*. 2002;360(9328):203-10.
- 928 54. Goa KL, Mctavish D, Clissold SP. Ivermectin - a review of Its antifilarial activity, pharmacokinetic  
929 properties and clinical efficacy in Onchocerciasis. *Drugs*. 1991;42(4):640-58.
- 930 55. Thai KTD, Nga TTT, Nam NV, Phuong HL, Giao PT, Hung LQ, et al. A rapid health impact assessment of  
931 the African Programme for Onchocerciasis Control (APOC). *Tropical Medicine and International Health*.  
932 2007;12:133-.

- 933 56. Osei-Atweneboano MY, Eng JKL, Boakye DA, Gyapong JO, Prichard RK. Prevalence and intensity of  
934 *Onchocerca volvulus* infection and efficacy of ivermectin in endemic communities in Ghana: a two-phase  
935 epidemiological study. *Lancet*. 2007;369(9578):2021-9.
- 936 57. Plaisier AP, Alley ES, Boatman BA, Vanoortmarssen GJ, Remme H, Devlas SJ, et al. Irreversible effects of  
937 ivermectin on adult parasites in Onchocerciasis patients in the Onchocerciasis Control Program in West-  
938 Africa. *Journal of Infectious Diseases*. 1995;172(1):204-10.
- 939 58. Guimapi RA, Mohamed SA, Ekesi S, Biber-Freudenberger L, Borgemeister C, Tonnang HEZ. Optimizing  
940 spatial positioning of traps in the context of integrated pest management. *Ecological Complexity*.  
941 2020;41:100808.
- 942 59. Sharma S, Smith ME, Bilal S, Michael E. Evaluating elimination thresholds and stopping criteria for  
943 interventions against the vector-borne macroparasitic disease, lymphatic filariasis, using mathematical  
944 modelling. *Communications Biology*. 2023;6(1):225.
- 945 60. Koala L, Nikiema AS, Pare AB, Drabo F, Toe LD, Belem AMG, et al. Entomological assessment of the  
946 transmission following recrudescence of onchocerciasis in the Comoe Valley, Burkina Faso. *Parasite and*  
947 *Vectors*. 2019;12(1):34.
- 948 61. Michael E, Singh BK. Heterogeneous dynamics, robustness/fragility trade-offs, and the eradication of  
949 the macroparasitic disease, lymphatic filariasis. *BMC Medicine*. 2016;14.
- 950 62. Dietze MC, Lebauer DS, Kooper R. On improving the communication between models and data. *Plant*  
951 *Cell and Environment*. 2013;36(9):1575-85.
- 952 63. Byers JA. Correlated random walk equations of animal dispersal resolved by simulation. *Ecology*.  
953 2001;82(6):1680-90.
- 954 64. Cecilia H, Arnoux S, Picault S, Dicko A, Seck MT, Sall B, et al. Dispersal in heterogeneous environments  
955 drives population dynamics and control of tsetse flies. *Proceedings of the Royal Society B-Biological Sciences*.  
956 2021;288(1944).
- 957



## 958 **Supporting Information Captions**

959

960 S1 Fig. Model fits to baseline age-prevalence in study sites.

961 S1 Table. Parameters of the onchocerciasis transmission model.

962 S2 Table. Details of age and population dependent functions used in the transmission model.

963 S3 Table. Baseline Mf prevalences in the four study sites.

964 S4 Table. Priors of parameters related to trap efficacy, decay rate, drug efficacy, and for terms  
965 describing seasonal MBR.

966 S5 – S9 Tables. Years predicted for reaching the WHO set thresholds in the four study sites under  
967 annual and switch MDA with and without EWT in the homogeneous fly biting condition.

968 S10 – S14 Tables. Results on predicted timelines to reach the WHO set thresholds in the four study  
969 sites under annual and switch MDA with and without EWT in the heterogeneous fly biting  
970 condition.

971 S15 – S16 Tables. Estimated transmission elimination and recrudescence probabilities arising from  
972 the deployment of EWT at high coverage and efficacy values post stoppage of MDA during months  
973 of peak biting season and monthly throughout the year.

974

975

976 **Data Availability**

977 All relevant data are within the manuscript and its Supporting Information

978 **Code availability**

979 All the Matlab codes used in this work are available in Github:

980 <https://github.com/EdwinMichaelLab/OnchoEWT>

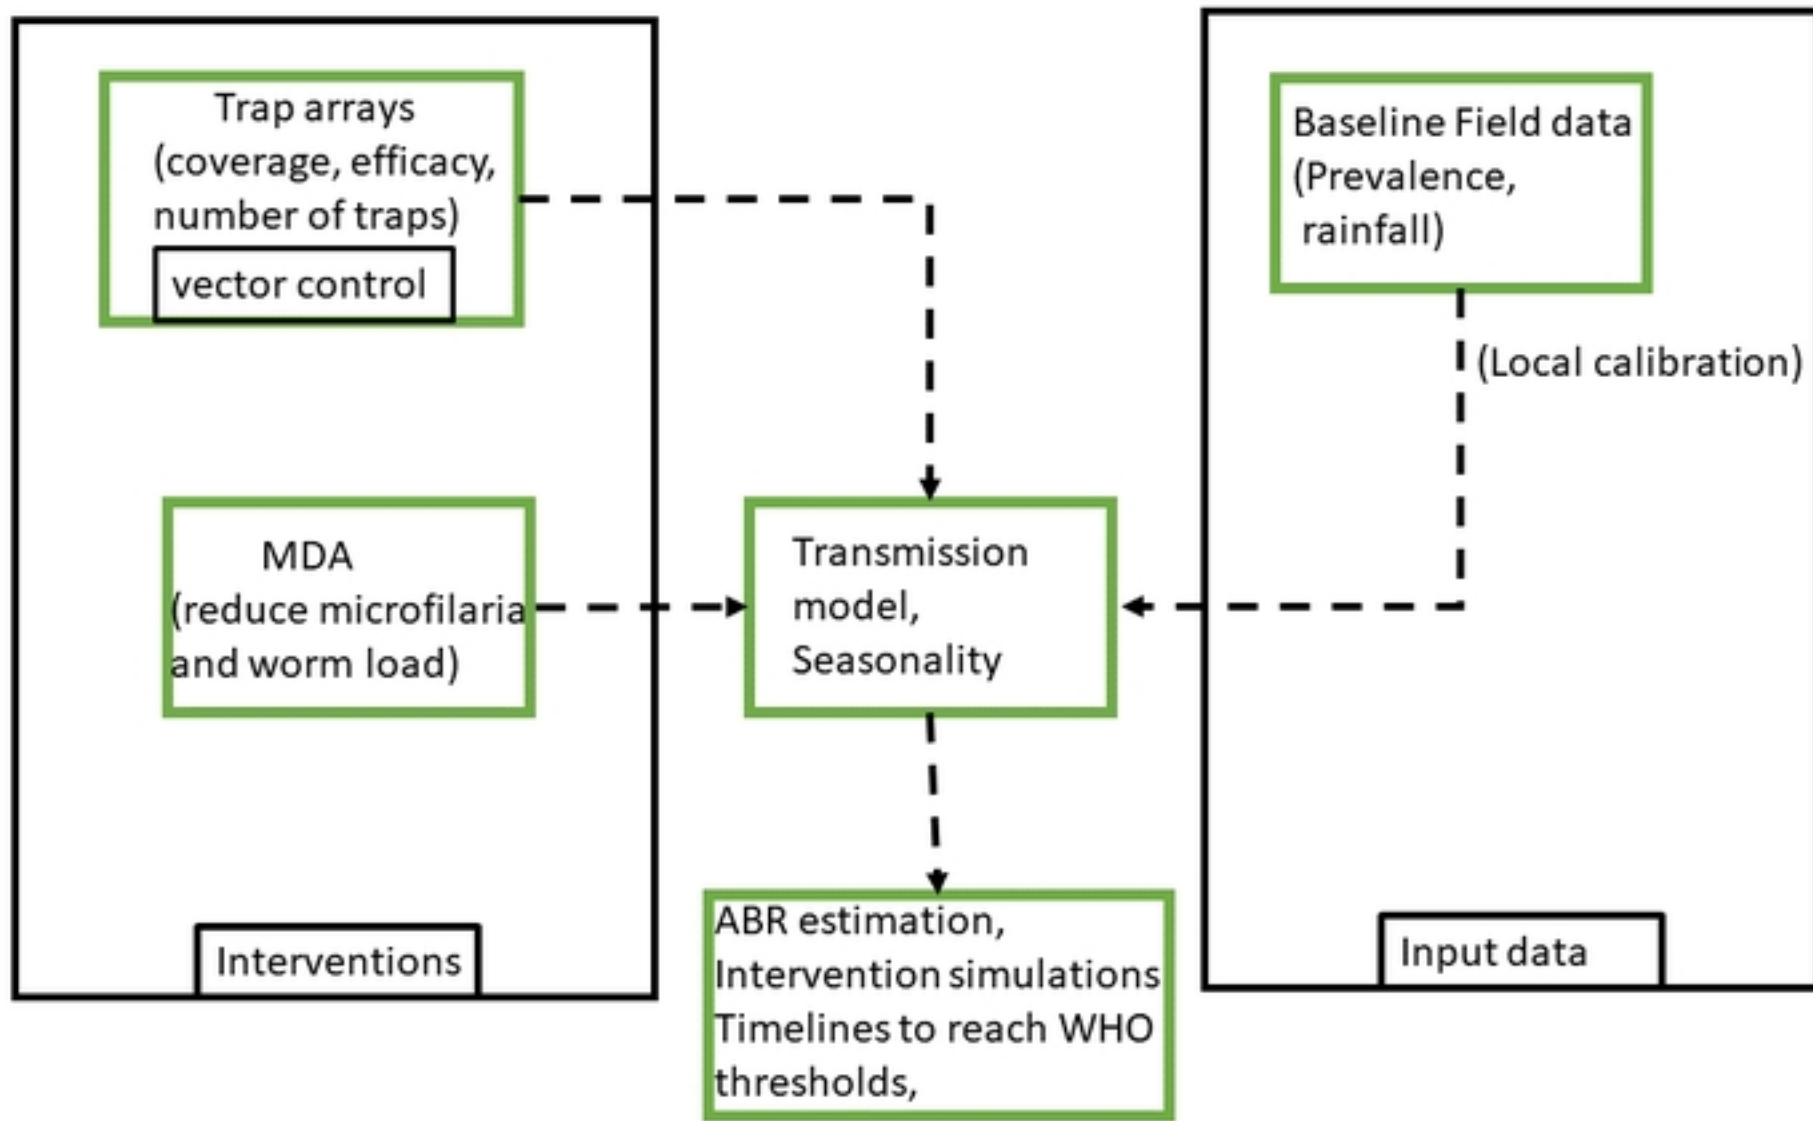

Figure 1

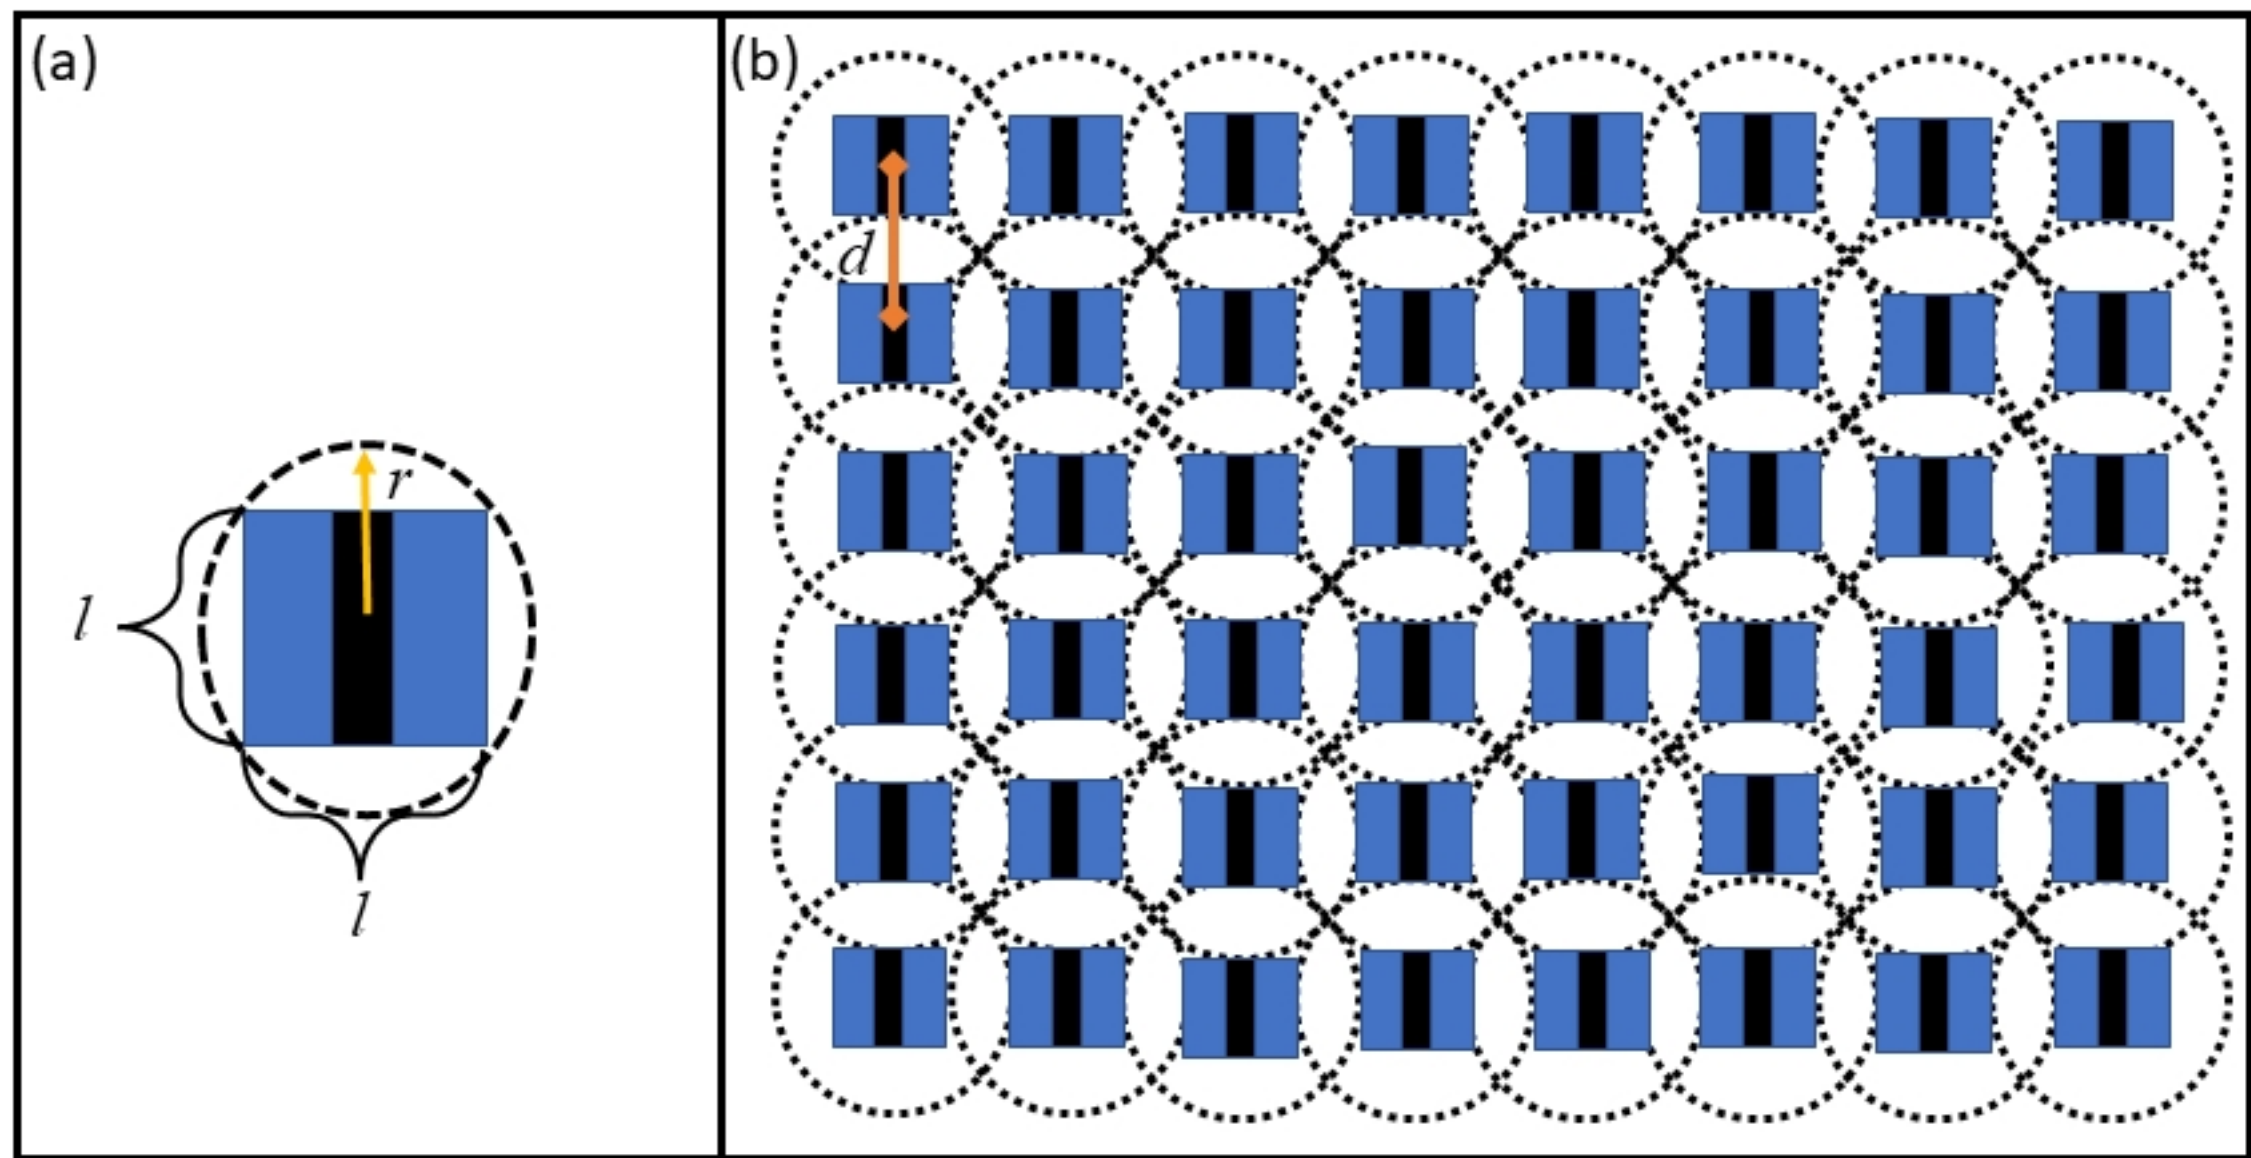

Figure 2

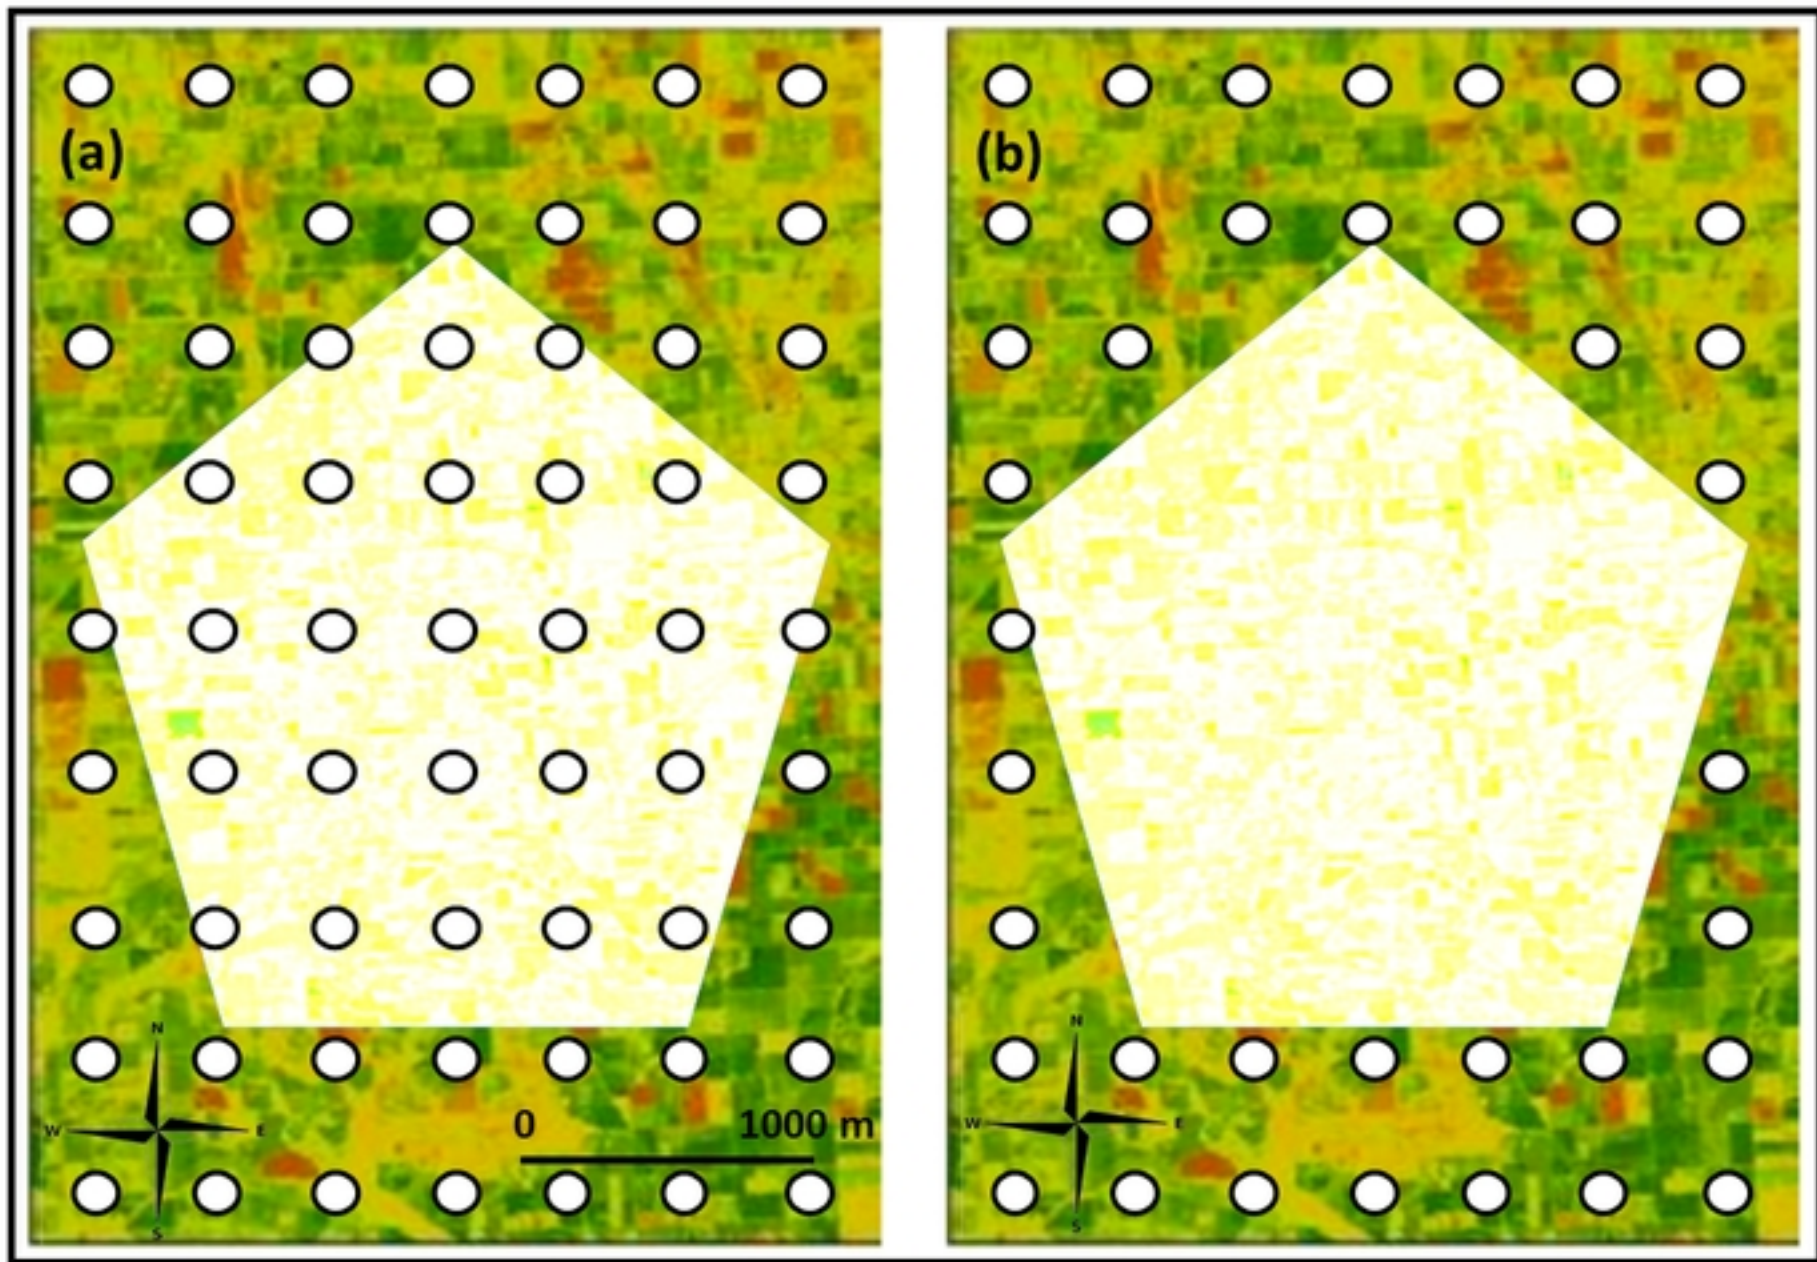

Figure 3

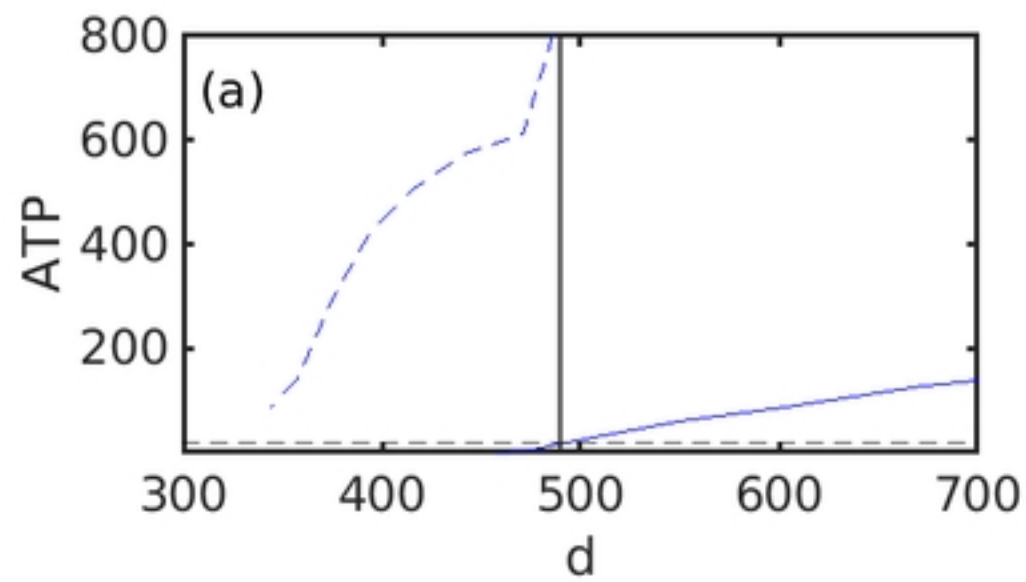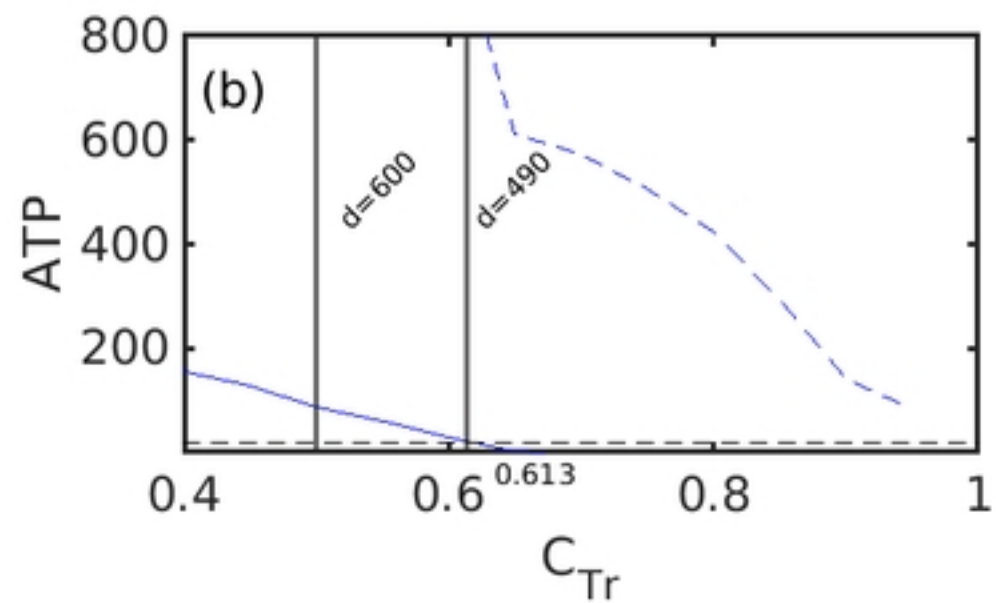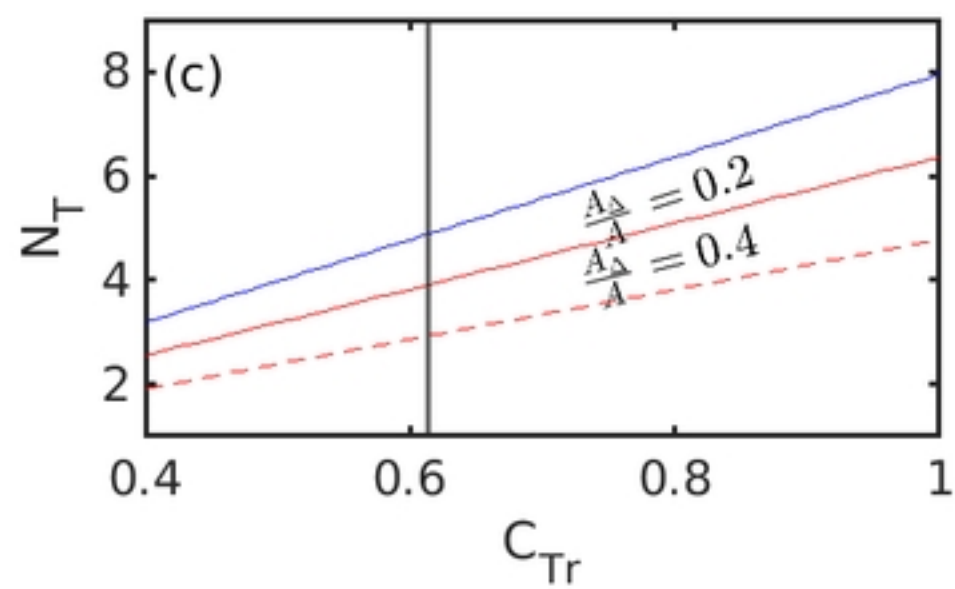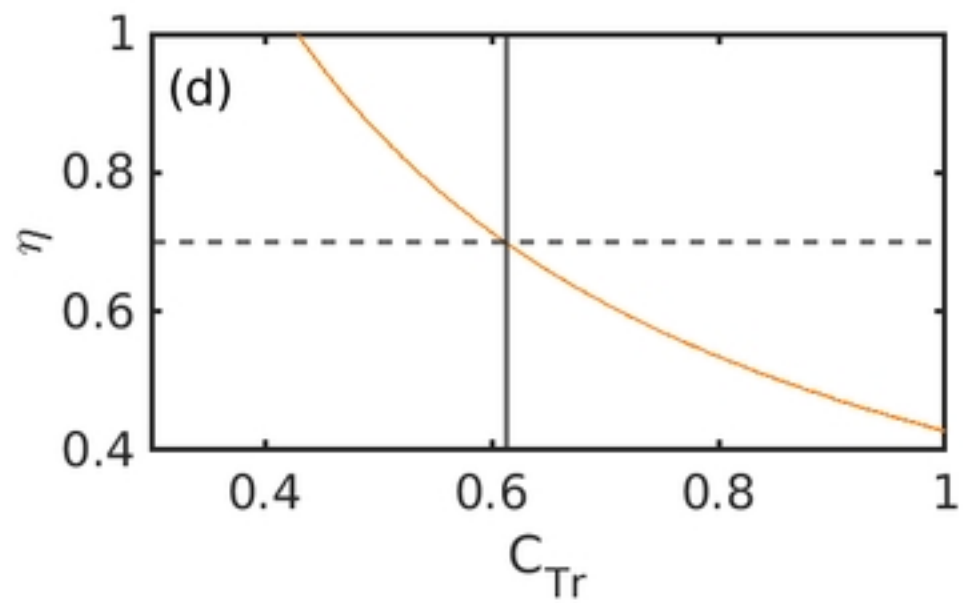

Figure 4

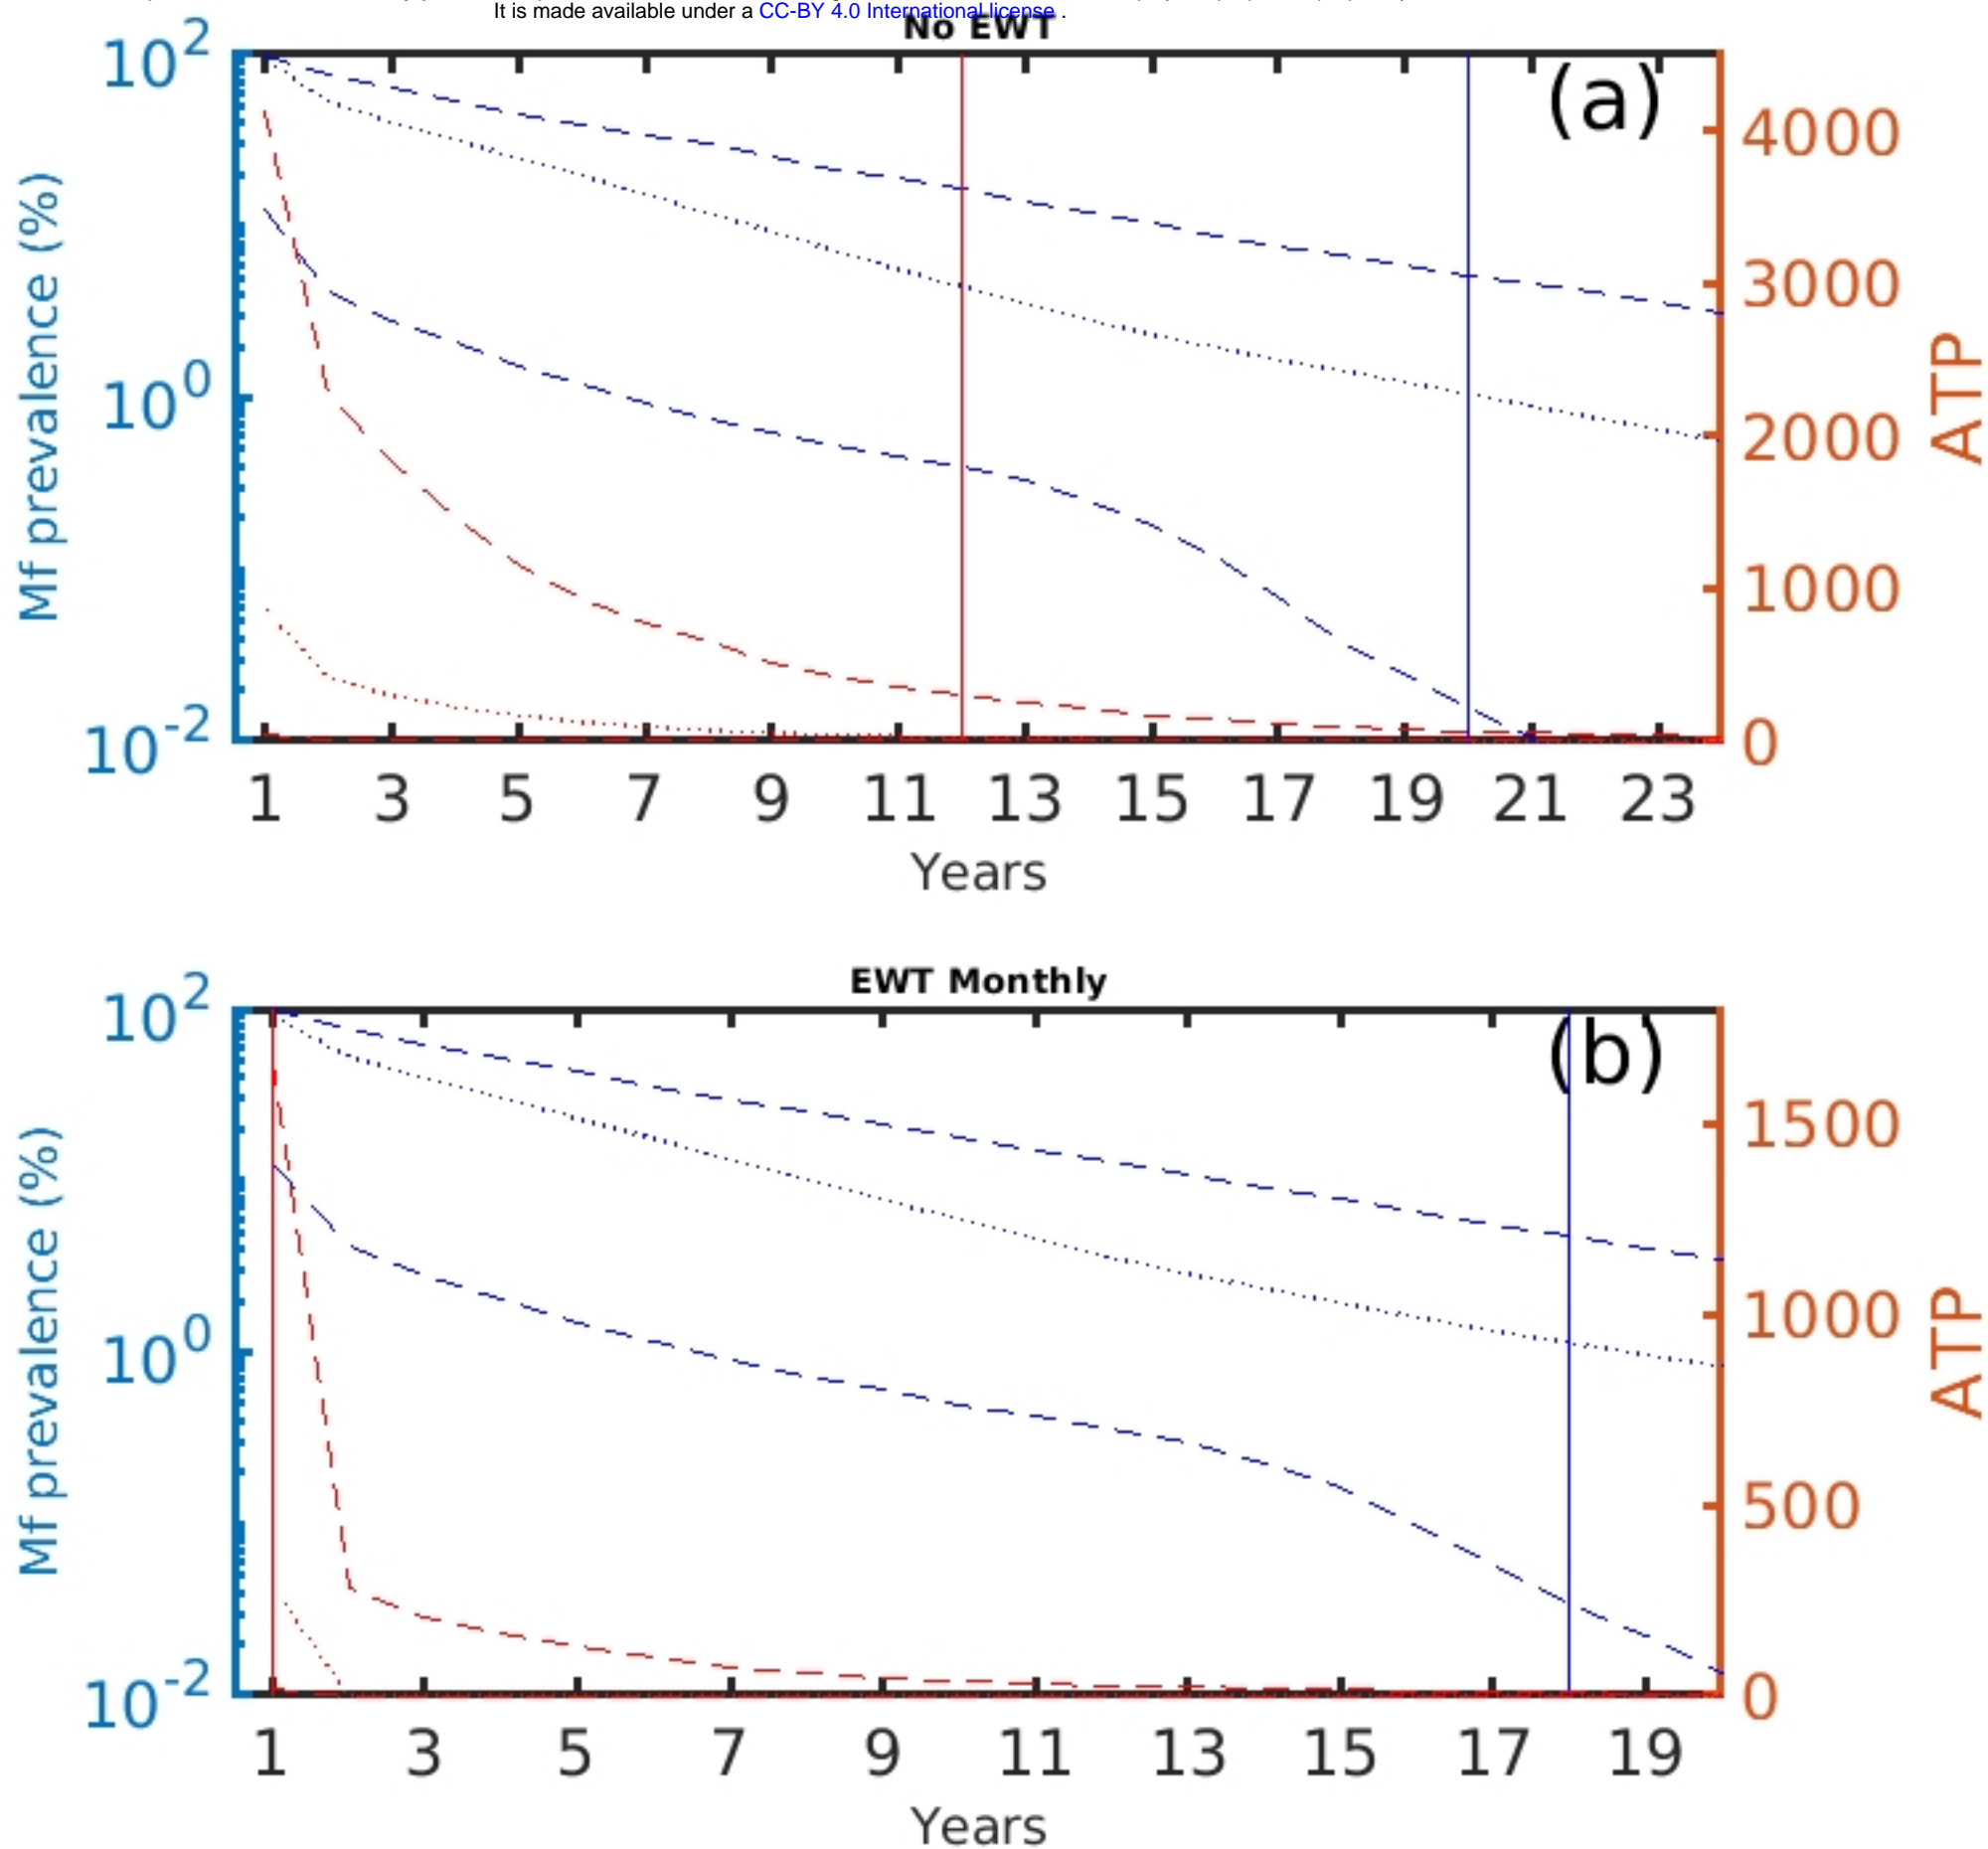

Figure 5

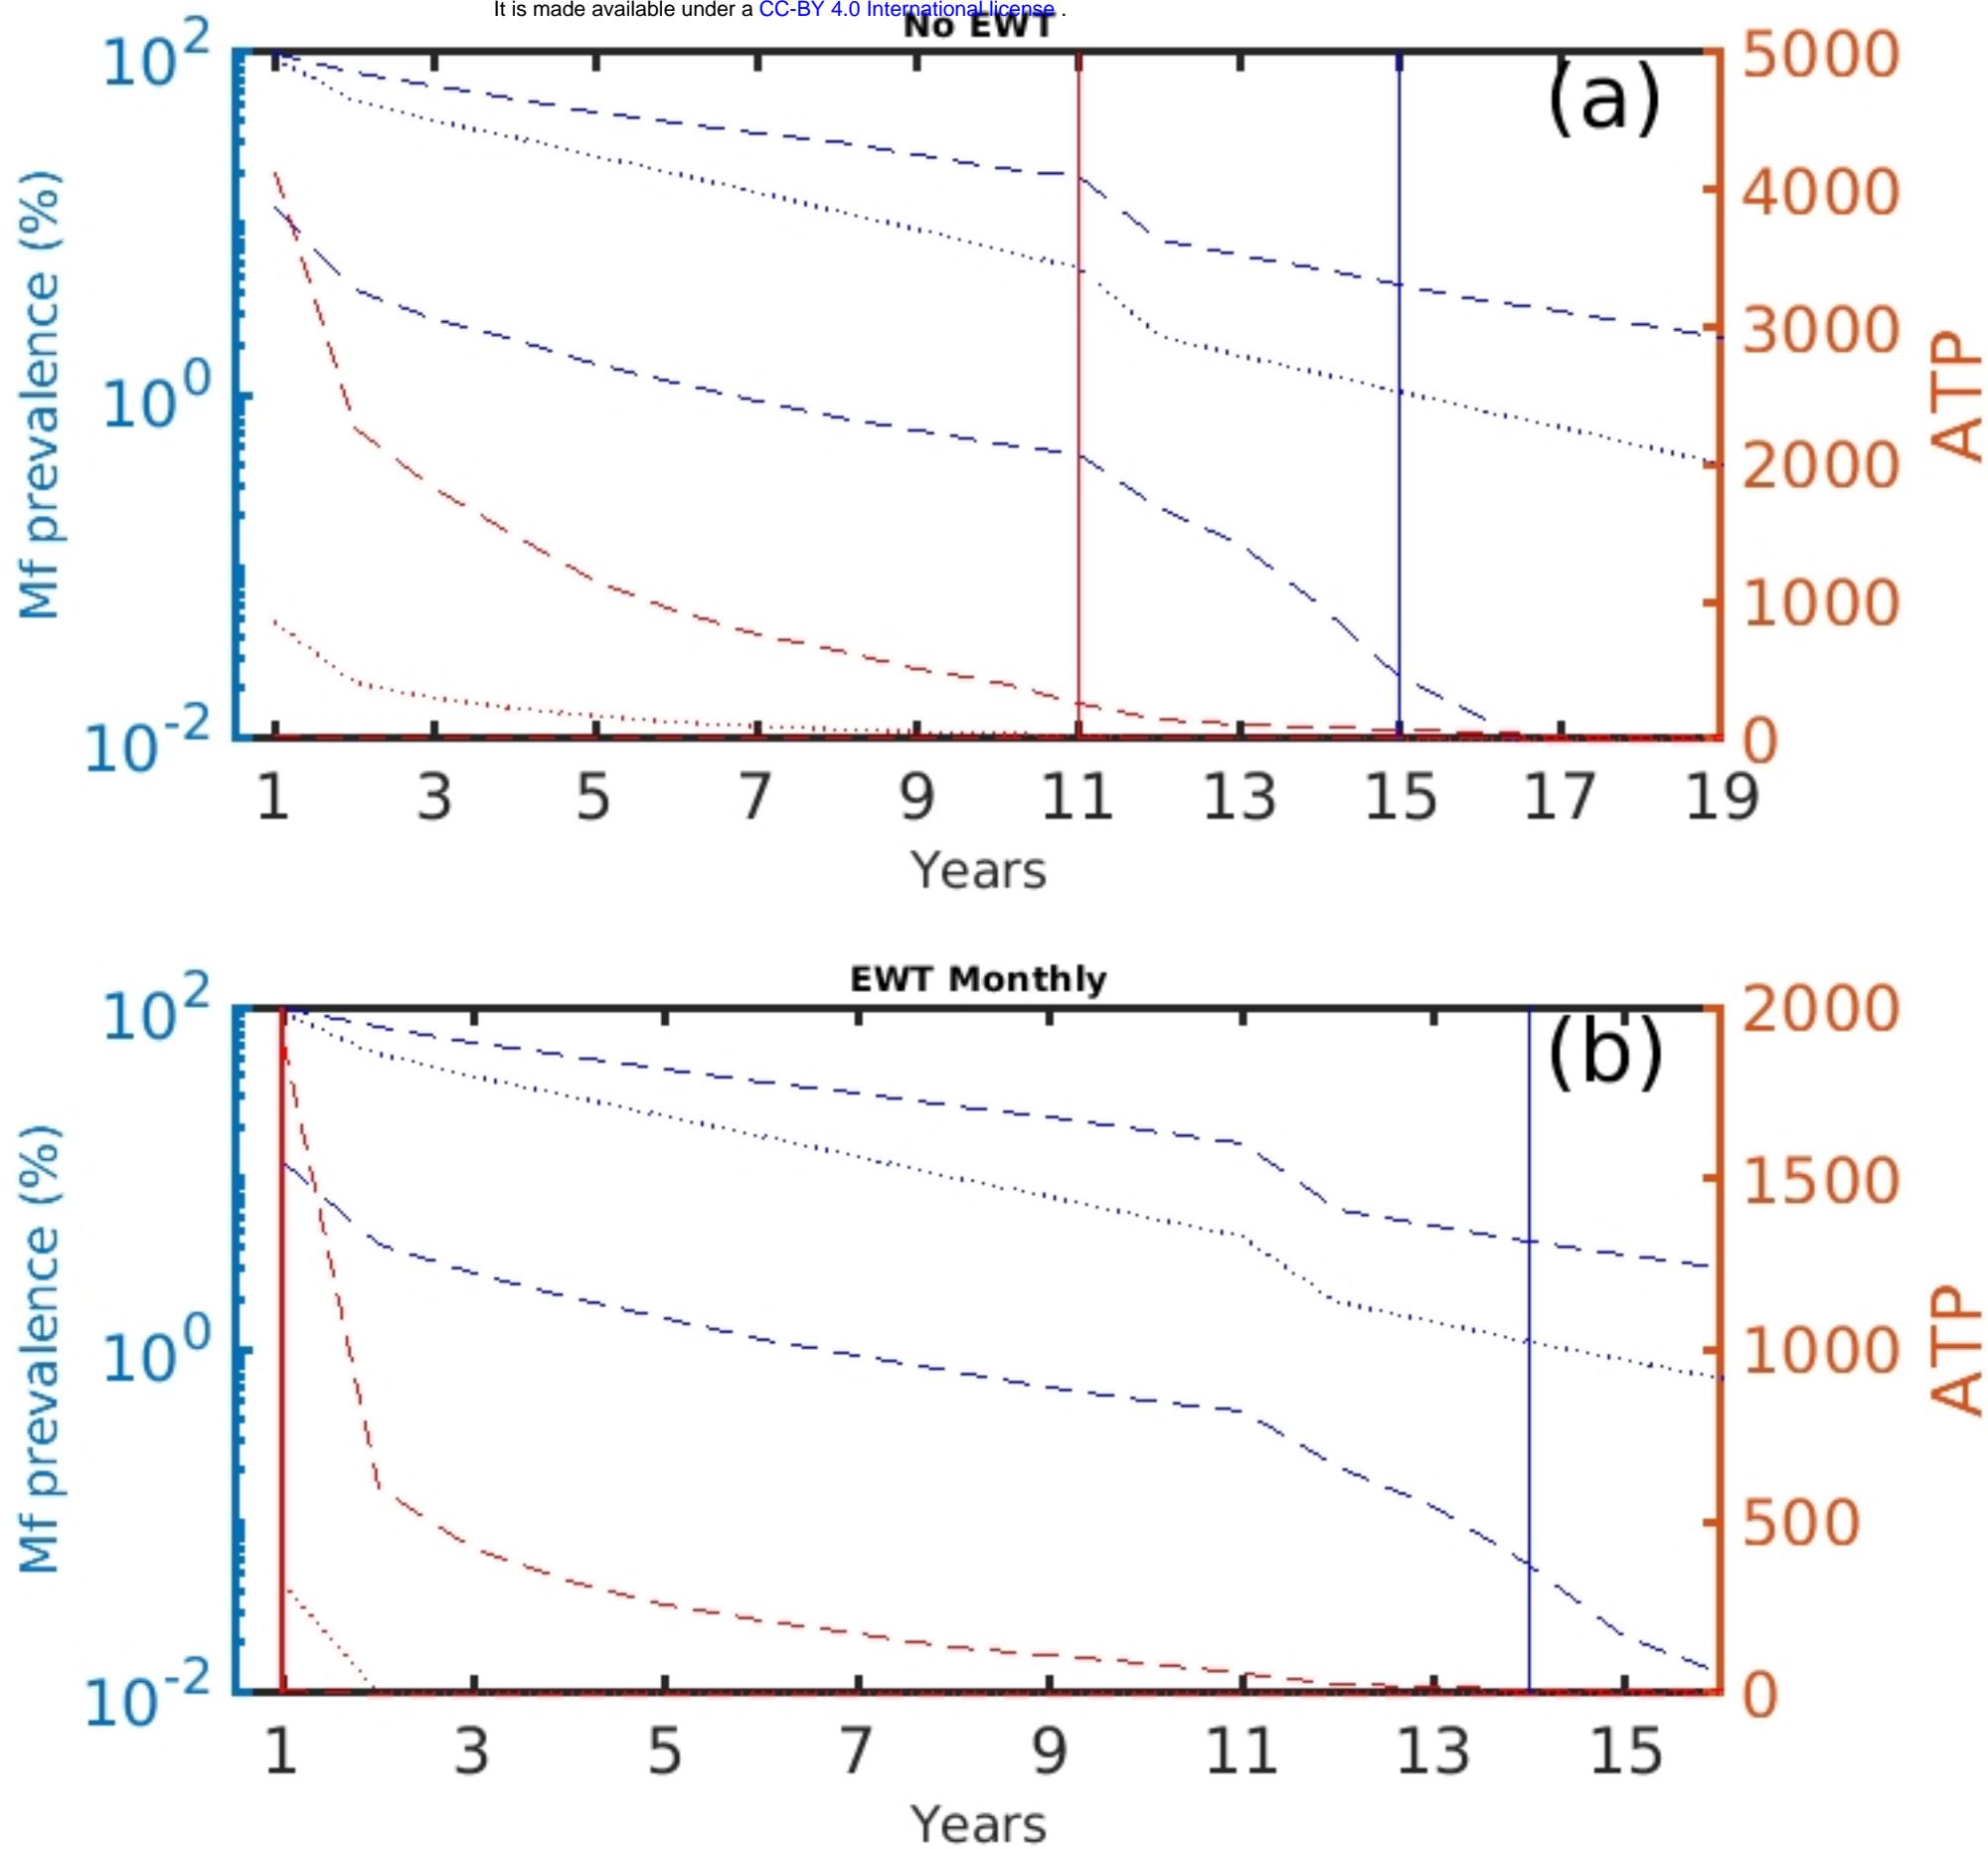

Figure 6



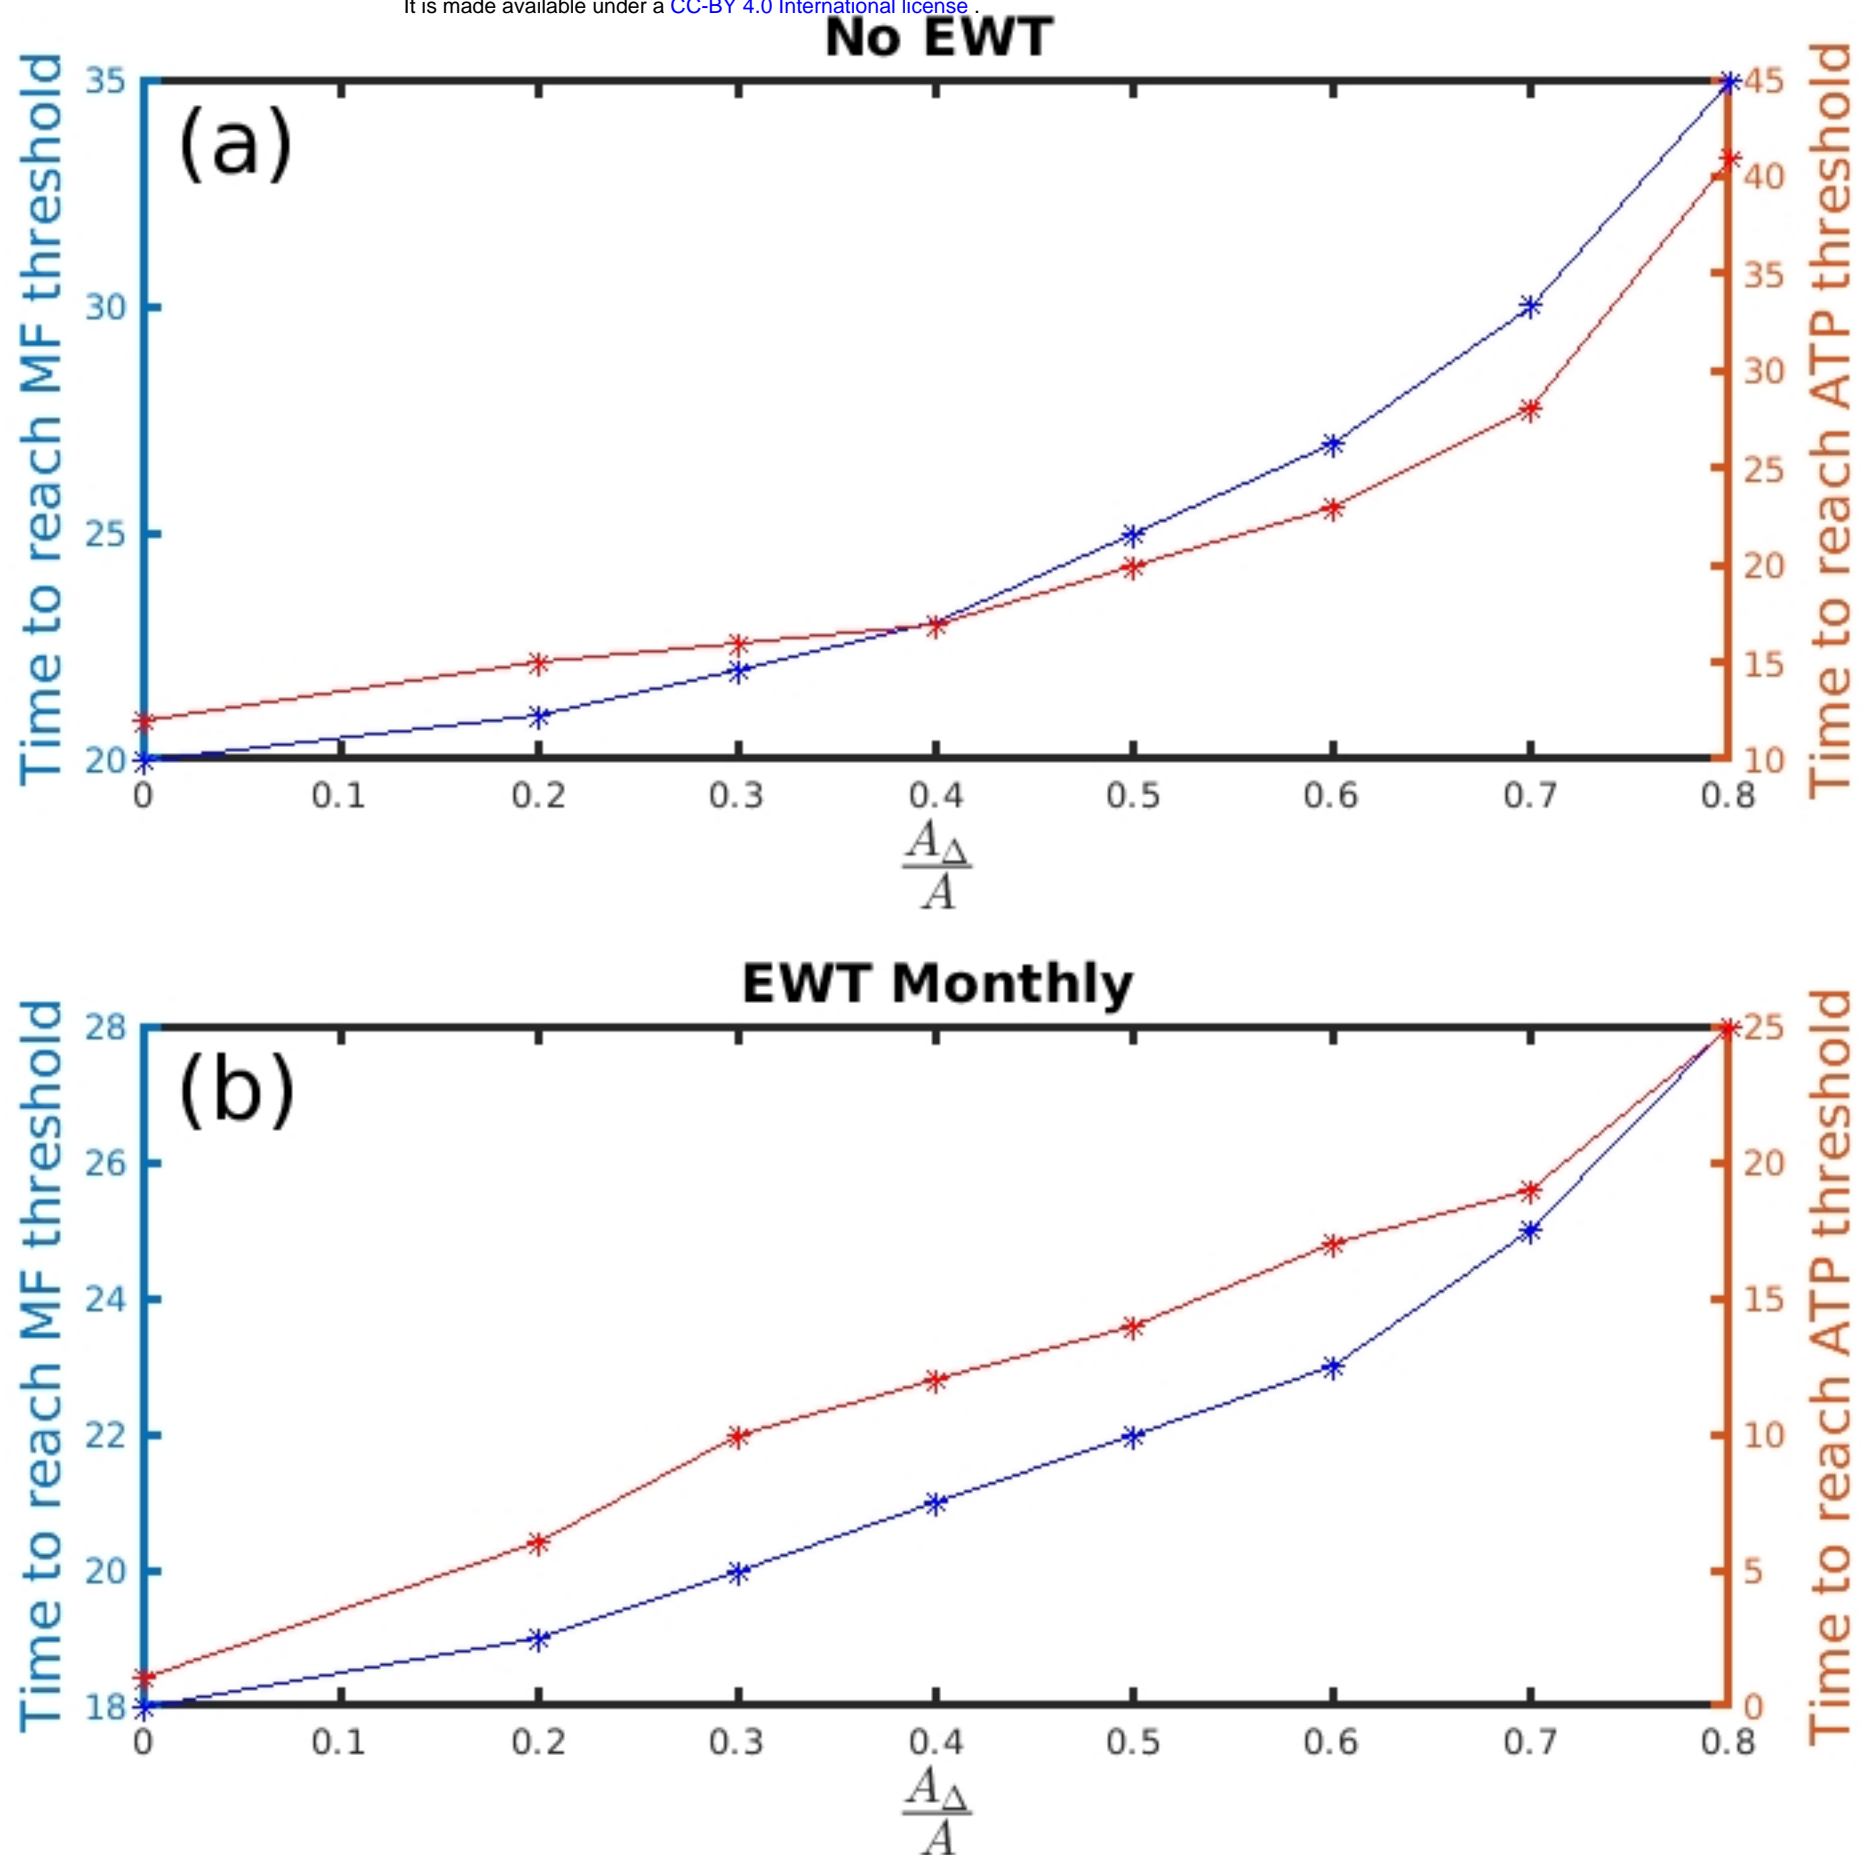

Figure 7

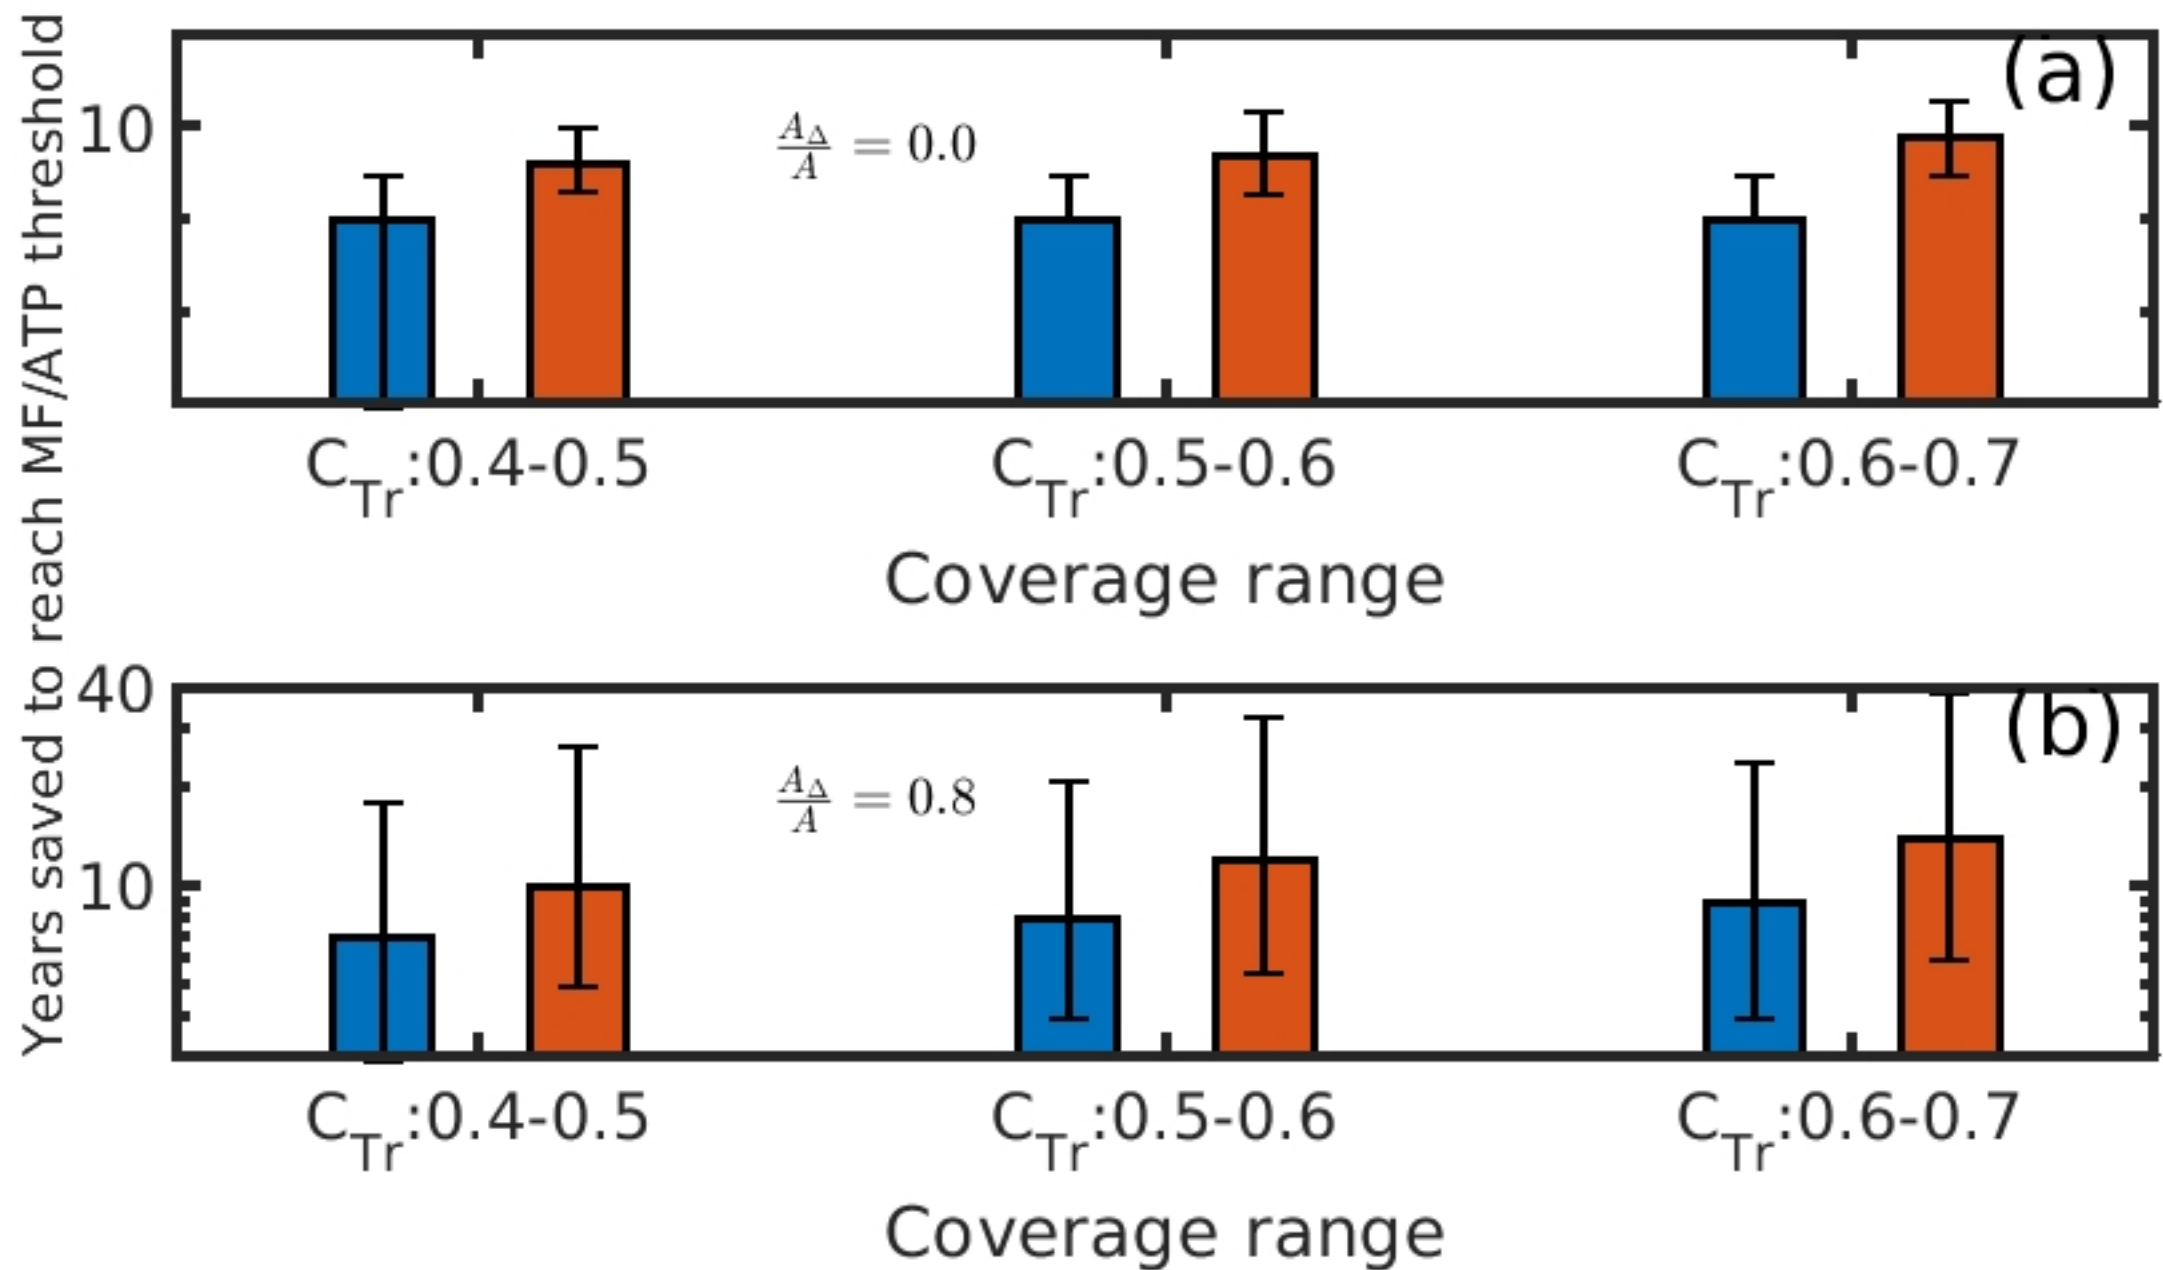

Figure 8

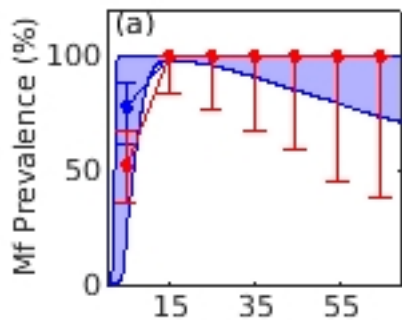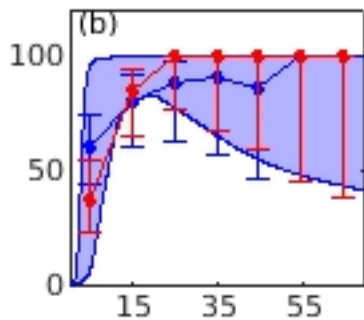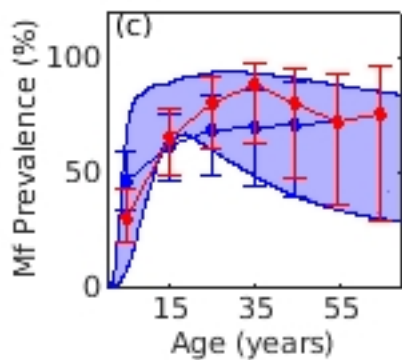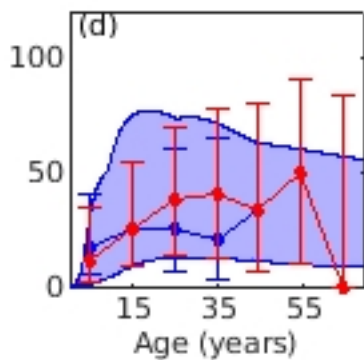

Figure 1S
